# Supplementary material for: Mechanistic insight into borrowing-hydrogenN-alkylation catalyzed by an MLC catalyst with dual proton-responsive sites
Source: Royal Society of Chemistry journal article supplement (doi:10.1039/d2dt02597c), 2022-01-01
Supplement: d2dt02597c1.pdf [file d2dt02597c1.pdf]

## Supplementary Information

### **Mechanistic insight into the borrowing-hydrogen N-alkylation catalyzed by an MLC catalyst with dual proton-responsive sites**

Lan Mei, Min Du, Yuan Zhang and Cheng Hou\*

School of Chemistry and Pharmaceutical Sciences, State Key Laboratory for  
Chemistry and Molecular Engineering of Medicinal Resources, Guangxi Normal  
University, Guilin, 541004, P. R. China

*\*Author to whom correspondence should be addressed at:  
houcheng@gxnu.edu.cn*

#### **Table of Contents**

|    |                                                                               |     |
|----|-------------------------------------------------------------------------------|-----|
| 1. | The comparison of free energy barriers using different functionals.....       | S2  |
| 2. | The catalytic cycle proposed by Beller et al. ....                            | S3  |
| 3. | The newly proposed catalytic cycle according to the DFT calculation.....      | S4  |
| 4. | The potential energy surface involving the condensation reaction. ....        | S5  |
| 5. | The comparison of the condensation reaction using different functionals. .... | S6  |
| 6. | The mechanistic preference analysis using energetic span model.....           | S7  |
| 7. | The catalytic activity of the catalyst without the $\gamma$ -NH site.....     | S8  |
| 8. | The DFT calculated energies of all optimized structures. ....                 | S9  |
| 9. | The Cartesian coordinates (xyz) for all optimized structures.....             | S11 |

## 1. The comparison of free energy barriers using different functionals

**Table S1.** The comparison of energy barrier using different functionals (kcal/mol)

| Functionals | 3   | $\alpha$ -TS4 <sub>a</sub> | $\gamma$ -5 | $\gamma$ -TS4 <sub>a</sub> |
|-------------|-----|----------------------------|-------------|----------------------------|
| M06-L       | 0.0 | 31.4                       | 0.0         | 20.7                       |
| BP86        | 0.0 | 36.4                       | 0.0         | 22.4                       |
| BMK         | 0.0 | 43.3                       | 0.0         | 34.1                       |
| M06         | 0.0 | 31.6                       | 0.0         | 22.4                       |

In order to select appropriate functional for our calculation, we compare a series of functionals which are widely used in the computational studies relevant to catalytic hydrogenation and dehydrogenation reaction. The rate-determining transition states and intermediates were calculated using different functionals. The results are shown in Table S1. The relative reaction activation energy calculated by different functionals is basically the same trend. Based on these results, we chose M06-L as the functional considering the computational expense and accuracy.

## 2. The catalytic cycle proposed by Beller et al.

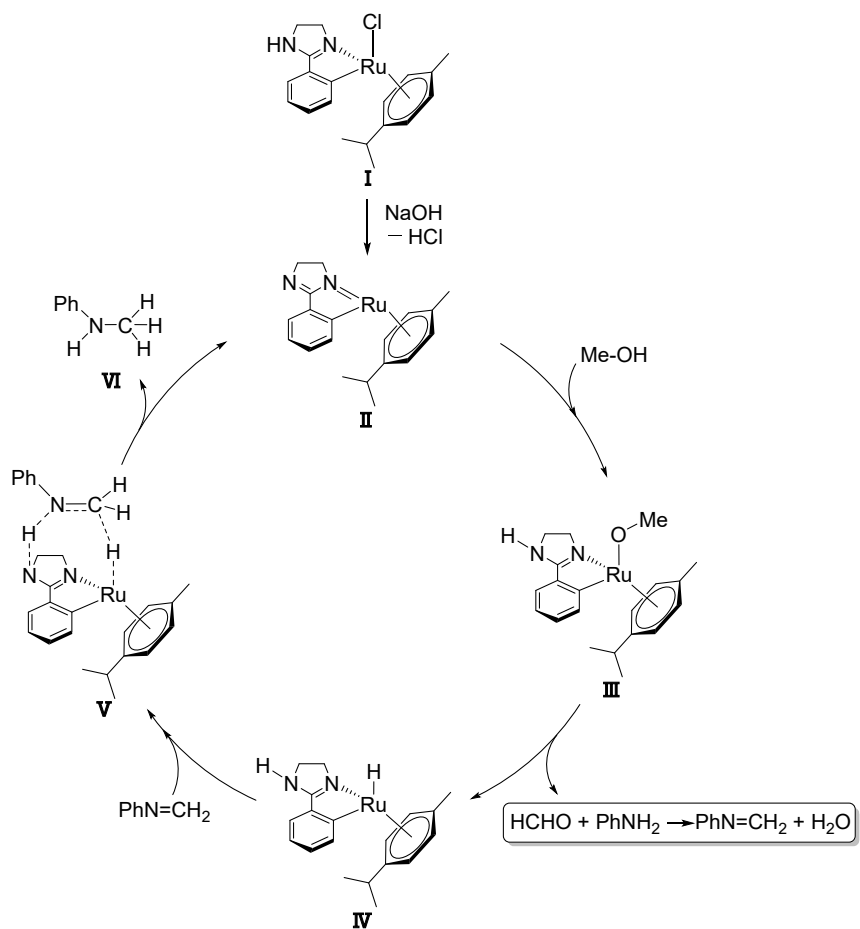

**Figure S1.** The catalytic cycle proposed by Beller et al.

### 3. The newly proposed catalytic cycle according to the DFT calculation

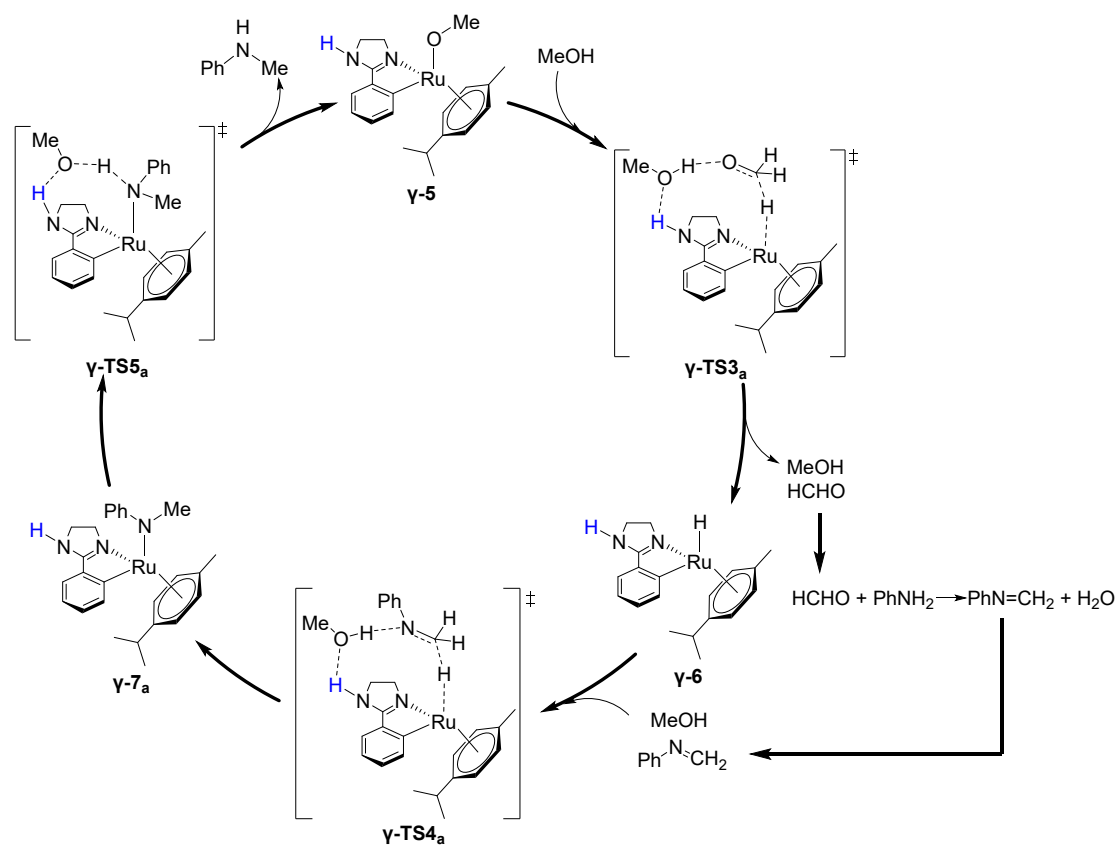

**Figure S2.** The newly proposed catalytic cycle according to the DFT calculation.

#### 4. The potential energy surface involving the condensation reaction

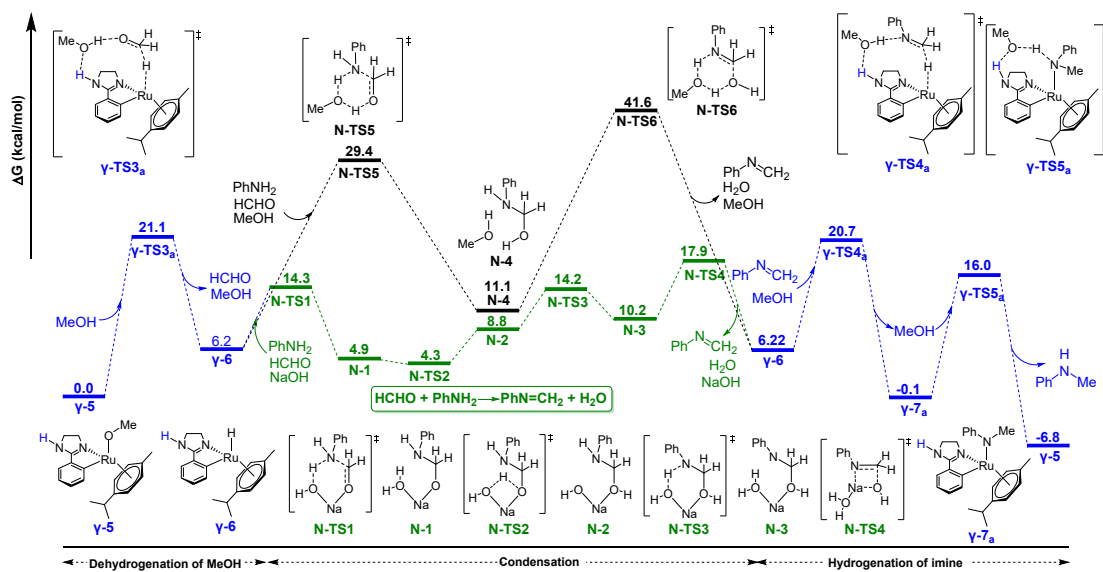

**Figure S3.** The potential energy surface involving the condensation reaction.

We tried to search for transition states of the condensation reaction. The proton shuttle transition states were successfully located, which possesses a high activation free energy barrier ( $\Delta G^\ddagger = 41.6$  kcal/mol) and seems less plausible. Considering the use of NaOH as the base in Beller's system, inspired by the work of Lei et al. (*Asian J. Org. Chem.*, **2021**, 10, 634-641), we perform further calculation including NaOH. The results show that the activation energy barrier for the condensation reaction assisted by NaOH is 13.6 kcal/mol, which does not surpass the activation free energy barrier of hydride transfer and is consistent with the experimental results. Although **N-TS2** is lower compared with **N-1** and **N-2** in solvated free energy, the electronic energy in gas phase **N-TS2** is higher than **N-1** and **N-2** as the transition states were located on the potential electronic surface. Similar results have been obtained in Lei's work..

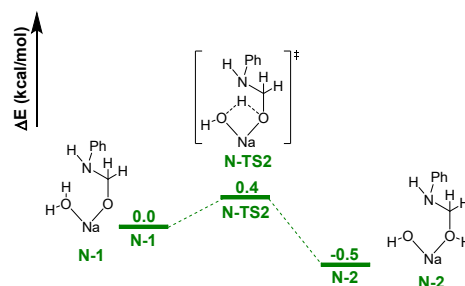

**Figure S4.** The electronic potential energy surface.

## 5. The comparison of the condensation reaction using different functionals

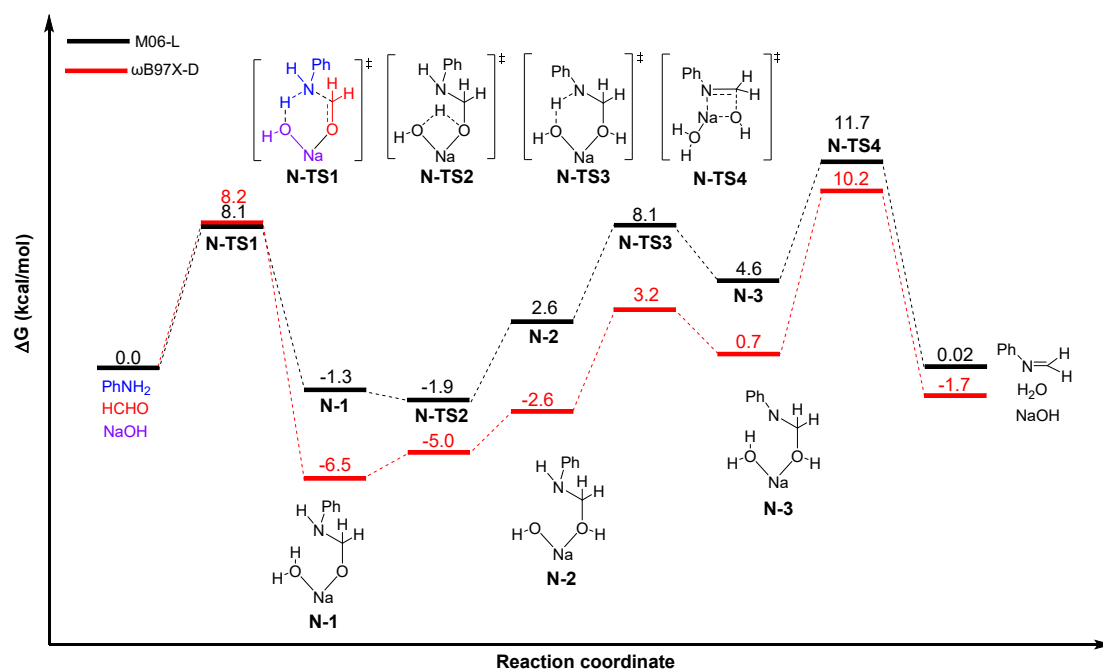

**Figure S5.** The comparison of the condensation reaction using different functionals.

Given the successful simulation of the condensation reaction process under alkaline conditions using the  $\omega$ B97X-D functional by Lei et al. (*Asian Journal of Organic Chemistry*, 2021, 10, 634-641.), we performed a comparative calculation using  $\omega$ b97x-d functional. The results show that the trends of M06-L and  $\omega$ B97X-D are basically the same, and the rate-determining steps are both located in the C-O bond cleavage step. With regard to the reliability of M06-L, the effect of CsCO<sub>3</sub> on C-H activation reaction was investigated by Musaev et al using M06-L (*J. Am. Chem. Soc.*, 2014, **136**, 14834-14844) and the mechanistic selectivity of [4 + 1] annulation in the presence or absence of a catalyst was investigated by Lan et al using M06-L (*Chin. Chem. Lett.*, **2022**, 33, 2031-2035.). These works also demonstrate the reliability of M06-L. The main objective of this paper is to compare the energy barrier differences and the mechanistic selectivity of ruthenium catalysts mediated by different ligand sites. Considering that the condensation reaction is not a rate determining step and the efficiency and reliability of M06-L in dealing with transition metal systems, we have continued to use the M06-L calculated data to analyze the

mechanism.

## 6. The mechanistic preference analysis using energetic span model

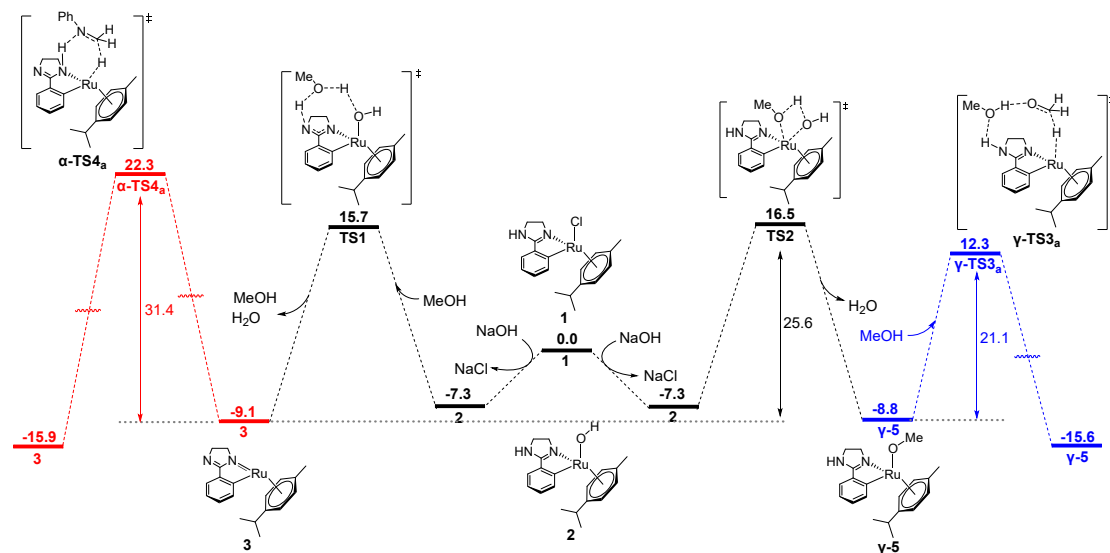

**Figure S6.** The mechanistic preference analysis using energetic span model.

We used the energetic span model to analyze the calculated potential energy surface. For the calculated data without the entropy correction, the pre-catalyst **1** undergoes the activation process and the **TS1** was found to have lower activation energy barrier. However, the subsequent  $\alpha$ -NH pathway way requires to overcome the barrier of 31.4 kcal/mol. Therefore, intermediate **3** returns to **TS2** with the activation energy barrier of 25.6 kcal/mol and give  $\gamma$ -**5**. The rate-determining step of the followed  $\gamma$ -NH pathway requires to overcome 21.1 kcal/mol. Therefore, the generation of  $\gamma$ -**5** is an irreversible process with the activation energy barrier of 25.3 kcal/mol ( $\gamma$ -**5**→**TS2**).

## 7. The catalytic activity of the catalyst without the $\gamma$ -NH site

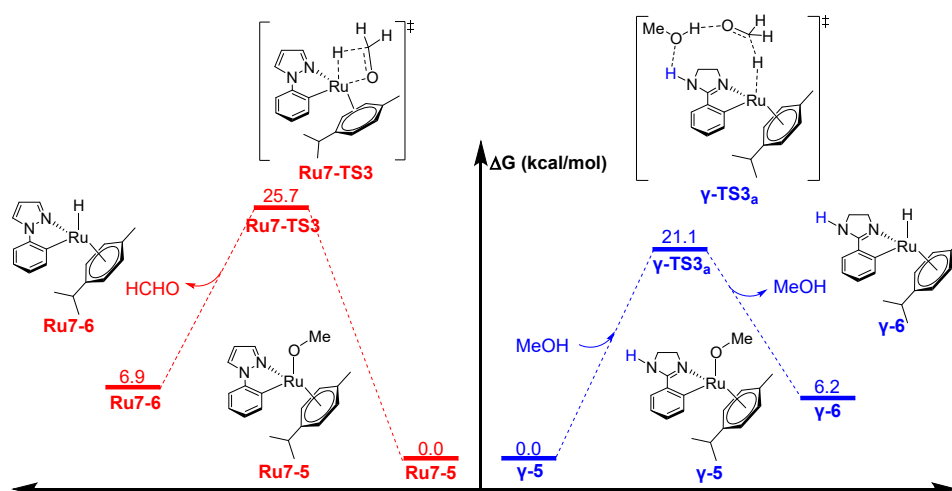

**Figure S7.** The comparison of the catalytic activity with and without the  $\gamma$ -NH site.

We have selected an example of a catalyst from the Beller's article that showed good activity without the  $\gamma$ -NH site and performed calculations on the absolute speed step of the reaction. The results show that the outer-sphere hydride transfer transition state cannot be located without the assistance of the  $\gamma$ -NH site and MeOH. However, the  $\beta$ -H elimination TS is located with an accessible activation free energy barrier of 25.7 kcal/mol, which can be overcome under reaction conditions at 70 °C. It is worth pointing out that the energy barrier of  $\gamma$ -NH site assisted transition state is only 21.1 kcal/mol, and thus the catalyst with  $\gamma$ -NH site exhibits superior catalytic activity.



## 8. The DFT calculated energies of all optimized structures

**Table S2.** The DFT calculated energies of all optimized structures

| Species                         | Hc hartree | Gc hartree | H(gas) hartree | G(gas) hartree | Esp + G <sub>SOL</sub> hartree | Final G hartree | <i>i</i> (cm <sup>-1</sup> ) |
|---------------------------------|------------|------------|----------------|----------------|--------------------------------|-----------------|------------------------------|
| MeOH                            | 0.055685   | 0.028759   | -115.557604    | -115.584530    | -115.755600                    | -115.726841     |                              |
| PhNH <sub>2</sub>               | 0.124106   | 0.088281   | -287.238504    | -287.274330    | -287.676957                    | -287.588676     |                              |
| HCHO                            | 0.030316   | 0.004843   | -114.369858    | -114.395331    | -114.534762                    | -114.529919     |                              |
| PhNCH <sub>2</sub>              | 0.128702   | 0.090786   | -325.275121    | -325.313037    | -325.757639                    | -325.666853     |                              |
| PhNCH <sub>3</sub>              | 0.153530   | 0.114002   | -326.479922    | -326.519450    | -326.988703                    | -326.874701     |                              |
| H <sub>2</sub> O                | 0.025469   | 0.004038   | -76.324566     | -76.345997     | -76.455741                     | -76.451703      |                              |
| NaCl                            | 0.004504   | -0.021490  | -622.353963    | -622.379957    | -622.602752                    | -622.624242     |                              |
| NaOH                            | 0.015404   | -0.010830  | -237.969147    | -237.995381    | -238.181331                    | -238.192161     |                              |
| <b><math>\alpha</math>-site</b> |            |            |                |                |                                |                 |                              |
| 1                               | 0.404645   | 0.329559   | -1401.382458   | -1401.457544   | -1402.884321                   | -1402.554762    |                              |
| 2                               | 0.416459   | 0.342591   | -1017.018284   | -1017.092152   | -1018.476954                   | -1018.134363    |                              |
| TS1                             | 0.466794   | 0.388052   | -1132.577152   | -1132.655894   | -1134.212498                   | -1133.824446    | -1322.34                     |
| 3                               | 0.387952   | 0.317420   | -940.665402    | -940.735934    | -942.002958                    | -941.685538     |                              |
| 4                               | 0.446707   | 0.368780   | -1056.224645   | -1056.302572   | -1057.755439                   | -1057.386659    |                              |
| $\alpha$ -TS2 <sub>a</sub>      | 0.441554   | 0.367525   | -1056.225203   | -1056.299231   | -1057.747974                   | -1057.380449    | -1084.53                     |
| $\alpha$ -TS2 <sub>b</sub>      | 0.438750   | 0.363110   | -1056.214160   | -1056.289790   | -1057.740780                   | -1057.377670    | -583.18                      |
| $\alpha$ -5                     | 0.446394   | 0.369822   | -1056.233646   | -1056.310218   | -1057.762878                   | -1057.393056    |                              |
| $\alpha$ -6                     | 0.441576   | 0.365222   | -1056.210215   | -1056.286569   | -1057.738993                   | -1057.373771    |                              |
| $\alpha$ -TS3 <sub>a</sub>      | 0.440144   | 0.363278   | -1056.211390   | -1056.288256   | -1057.731438                   | -1057.368160    | -265.86                      |
| $\alpha$ -TS3 <sub>b</sub>      | 0.441325   | 0.365162   | -1056.185081   | -1056.261244   | -1057.710648                   | -1057.345486    | -651.96                      |
| $\alpha$ -7                     | 0.408848   | 0.337547   | -941.829739    | -941.901039    | -943.188703                    | -942.851156     |                              |
| $\alpha$ -TS4 <sub>a</sub>      | 0.537999   | 0.451670   | -1267.117419   | -1267.203748   | -1268.950959                   | -1268.499289    | -481.25                      |
| $\alpha$ -TS4 <sub>b</sub>      | 0.539070   | 0.451630   | -1267.088760   | -1267.176190   | -1268.924850                   | -1268.473220    | -698.89                      |
| $\alpha$ -8 <sub>a</sub>        | 0.543143   | 0.457007   | -1267.135733   | -1267.221870   | -1268.973017                   | -1268.516010    |                              |
| $\alpha$ -TS5 <sub>a</sub>      | 0.539287   | 0.455914   | -1267.143571   | -1267.226943   | -1268.973107                   | -1268.517193    | -1284.43                     |
| $\alpha$ -8 <sub>b</sub>        | 0.539780   | 0.452527   | -1267.119682   | -1267.206935   | -1268.960284                   | -1268.507757    |                              |
| $\alpha$ -TS5 <sub>b</sub>      | 0.536296   | 0.449070   | -1267.122729   | -1267.209955   | -1268.959513                   | -1268.510443    | -719.17                      |
| <b><math>\gamma</math>-site</b> |            |            |                |                |                                |                 |                              |
| TS2                             | 0.469092   | 0.387462   | -1132.565200   | -1132.646800   | -1134.210700                   | -1133.823238    | -561.27                      |
| $\gamma$ -5                     | 0.445711   | 0.368762   | -1056.256324   | -1056.333273   | -1057.780557                   | -1057.411795    |                              |
| $\gamma$ -TS3 <sub>a</sub>      | 0.498662   | 0.410686   | -1171.809746   | -1171.897722   | -1173.515681                   | -1173.104995    | -304.22                      |
| $\gamma$ -TS3 <sub>b</sub>      | 0.441210   | 0.364606   | -1056.211518   | -1056.288122   | -1057.733200                   | -1057.368594    | -588.88                      |
| $\gamma$ -6                     | 0.408816   | 0.336496   | -941.852113    | -941.924432    | -943.208425                    | -942.871929     |                              |
| $\gamma$ -TS4 <sub>a</sub>      | 0.594979   | 0.495506   | -1382.721703   | -1382.821175   | -1384.738057                   | -1384.242551    | -489.94                      |
| $\gamma$ -7a                    | 0.543557   | 0.455920   | -1267.167267   | -1267.254904   | -1269.004863                   | -1268.548943    |                              |
| $\gamma$ -TS5 <sub>a</sub>      | 0.598085   | 0.506836   | -1382.731211   | -1382.822460   | -1384.756871                   | -1384.250035    | -327.20                      |
| $\gamma$ -TS5 <sub>d</sub>      | 0.596387   | 0.503612   | -1382.721114   | -1382.813889   | -1384.732637                   | -1384.229025    | -861.94                      |
| $\gamma$ -TS4 <sub>b</sub>      | 0.538862   | 0.454731   | -1267.138059   | -1267.222190   | -1268.967963                   | -1268.513232    | -489.52                      |

|                                                |          |          |              |              |              |              |          |
|------------------------------------------------|----------|----------|--------------|--------------|--------------|--------------|----------|
| $\gamma$ -7 <sub>b</sub>                       | 0.540573 | 0.452331 | -1267.139196 | -1267.227437 | -1268.975437 | -1268.523106 |          |
| $\gamma$ -TS5 <sub>b</sub>                     | 0.536228 | 0.448276 | -1267.124748 | -1267.212700 | -1268.958306 | -1268.510030 | -1445.29 |
| $\gamma$ -7 <sub>c</sub>                       | 0.598507 | 0.499160 | -1382.725554 | -1382.824901 | -1384.750104 | -1384.250944 |          |
| $\gamma$ -TS5 <sub>c</sub>                     | 0.594196 | 0.499203 | -1382.721214 | -1382.816207 | -1384.746136 | -1384.246933 | -1290.56 |
| <b><math>\alpha</math>-<math>\gamma</math></b> |          |          |              |              |              |              |          |
| TSa                                            | 0.487504 | 0.404059 | -1133.722663 | -1133.806108 | -1135.380269 | -1134.976210 | -694.64  |
| TSb                                            | 0.406891 | 0.334060 | -941.793451  | -941.866281  | -943.155855  | -942.821795  | -153.46  |
| TS <sub>c</sub>                                | 0.461273 | 0.382340 | -1057.346271 | -1057.425204 | -1058.895826 | -1058.513486 | -814.22  |
| TSd                                            | 0.519465 | 0.432678 | -1172.954350 | -1173.041137 | -1174.683772 | -1174.251094 | -176.68  |
|                                                |          |          |              |              |              |              |          |
| N-TS1                                          | 0.173494 | 0.122540 | -639.642441  | -639.693395  | -640.420372  | -640.297832  | -139.04  |
| N-1                                            | 0.176906 | 0.124752 | -639.652595  | -639.704749  | -640.437612  | -640.312860  |          |
| N-TS2                                          | 0.173592 | 0.124431 | -639.655316  | -639.704478  | -640.438264  | -640.313833  | -510.54  |
| N-2                                            | 0.177485 | 0.127330 | -639.652830  | -639.702985  | -640.433908  | -640.306578  |          |
| N-TS3                                          | 0.172558 | 0.123324 | -639.647661  | -639.696895  | -640.421269  | -640.297945  | -676.96  |
| N-3                                            | 0.176288 | 0.124047 | -639.649668  | -639.701910  | -640.428489  | -640.304442  |          |
| N-TS4                                          | 0.174577 | 0.123142 | -639.640449  | -639.691884  | -640.415213  | -640.292071  | -155.54  |
| N-TS5                                          | 0.210350 | 0.161161 | -517.162890  | -517.212079  | -517.959752  | -517.798591  | -1226.90 |
| N-4                                            | 0.218565 | 0.165884 | -517.197661  | -517.250342  | -517.993571  | -517.827687  |          |
| N-TS6                                          | 0.208466 | 0.157659 | -517.148190  | -517.198996  | -517.936828  | -517.779169  | -1517.04 |
| Ru7-5                                          | 0.421044 | 0.344555 | -1055.057402 | -1055.133892 | -1056.553223 | -1056.208668 |          |
| Ru7-TS3                                        | 0.416616 | 0.341558 | -1055.015649 | -1055.090708 | -1056.509339 | -1056.167781 | -638.44  |
| Ru7-6                                          | 0.384246 | 0.313856 | -940.655050  | -940.725440  | -941.981551  | -941.667695  |          |

- The  $H_C$  and  $G_C$  designate the thermal correction of Enthalpy and Gibbs Free Energy at M06-L/def2-SVP level.
- The  $H(\text{gas})$  and  $G(\text{gas})$  designate Enthalpy and Gibbs Free Energy in the gas phase at the M06-L/def2-SVP level.
- The  $E_{SP} + G_{SOL}$  designates the sum of single point energy at M06-L/def2-TZVP level and the solvation free energy calculated by SMD continuum solvent mode.
- The  $i$  designates the imaginary frequency of transition states.

## 9. The Cartesian coordinates (xyz) for all optimized structures

|                  |             |             |             |                    |             |             |             |                    |             |             |             |
|------------------|-------------|-------------|-------------|--------------------|-------------|-------------|-------------|--------------------|-------------|-------------|-------------|
| NaCl             |             |             |             | O                  | -0.00000000 | 0.00000000  | 0.11920400  | C                  | -0.04022300 | 1.09575100  | -0.15463100 |
|                  |             |             |             | H                  | -0.00000000 | 0.75607600  | -0.47681600 | C                  | 1.70267200  | -1.06473200 | 0.11265100  |
| Na               | 0.00000000  | 0.00000000  | -1.42508700 | H                  | -0.00000000 | -0.75607600 | -0.47681600 | H                  | -0.06965700 | -2.30472400 | -0.04343100 |
| Cl               | 0.00000000  | 0.00000000  | 0.92211500  |                    |             |             |             | C                  | 1.32993300  | 1.31404300  | -0.03769600 |
|                  |             |             |             |                    |             |             |             | H                  | -0.72419500 | 1.93755500  | -0.29107100 |
|                  |             |             |             | MeOH               |             |             |             | C                  | 2.20552800  | 0.23791300  | 0.10638500  |
| NaOH             |             |             |             |                    |             |             |             | H                  | 2.38386800  | -1.91275200 | 0.21513900  |
|                  |             |             |             | C                  | 0.64930300  | -0.01952100 | -0.00000000 | H                  | 1.71808000  | 2.33515900  | -0.06476700 |
| O                | 0.00750900  | 1.00834000  | 0.00000000  | H                  | 1.08655600  | 0.98731900  | 0.00008800  | H                  | 3.27958700  | 0.41286600  | 0.19843500  |
| H                | -0.14266800 | 1.95202100  | 0.00000000  | H                  | 1.04051800  | -0.54308500 | 0.89213500  | C                  | -2.78313000 | 0.23300100  | 0.28915600  |
| Na               | 0.00750900  | -0.91079400 | 0.00000000  | H                  | 1.04053200  | -0.54293500 | -0.89221800 |                    |             |             |             |
|                  |             |             |             | O                  | -0.74189000 | 0.12189800  | -0.00000000 |                    |             |             |             |
| HCHO             |             |             |             | H                  | -1.12830200 | -0.75935400 | -0.00000200 | PhNCH <sub>3</sub> |             |             |             |
|                  |             |             |             |                    |             |             |             | H                  | -2.80171700 | 1.11198400  | -0.74105500 |
| C                | -0.52196800 | 0.00000000  | 0.00000600  |                    |             |             |             | H                  | -3.79837700 | -0.13233000 | 0.01855800  |
| O                | 0.67421500  | 0.00000000  | -0.00000800 | PhNCH <sub>2</sub> |             |             |             | N                  | -1.78327200 | -0.61068200 | -0.09884400 |
| H                | -1.13095700 | 0.94249500  | -0.00000800 |                    |             |             |             | C                  | -0.44625200 | -0.28385800 | -0.03829000 |
| H                | -1.13095700 | -0.94249500 | 0.00003100  | H                  | -2.53704000 | 1.07483200  | 0.96840200  | C                  | 0.52939100  | -1.30120200 | -0.00335900 |
|                  |             |             |             | H                  | -3.85026200 | 0.02810400  | 0.12641900  | C                  | -0.01098900 | 1.05512600  | -0.03309100 |
|                  |             |             |             | N                  | -1.91520000 | -0.49138500 | -0.28353600 | C                  | 1.88158800  | -0.98781500 | 0.02726700  |
| H <sub>2</sub> O |             |             |             | C                  | -0.55192200 | -0.21253100 | -0.14125600 | C                  | 1.88158800  | -0.98781500 | 0.02726700  |
|                  |             |             |             | C                  | 0.33814500  | -1.29200200 | -0.02867000 | H                  | 0.20761000  | -2.34692000 | -0.00501300 |

|                   |             |             |             |   |             |             |             |                          |             |             |             |
|-------------------|-------------|-------------|-------------|---|-------------|-------------|-------------|--------------------------|-------------|-------------|-------------|
| C                 | 1.34990400  | 1.35296300  | -0.00718000 | H | -2.78265500 | 0.83953100  | 0.25890100  | C                        | 1.59120400  | -1.50801800 | 1.14836000  |
| H                 | -0.74076000 | 1.86683600  | -0.05041300 |   |             |             |             | C                        | 0.77831700  | -2.44400800 | 0.46353400  |
| C                 | 2.30878500  | 0.34253000  | 0.02345500  |   |             |             |             | C                        | 0.64210200  | -2.38880300 | -0.94660200 |
| H                 | 2.61507500  | -1.79778300 | 0.05445500  | 3 |             |             |             | H                        | 1.27710500  | -1.28785300 | -2.71796400 |
| H                 | 1.66181000  | 2.40065800  | -0.00568300 |   |             |             |             | H                        | 2.92265300  | 0.16598400  | -1.54449600 |
| H                 | 3.37279200  | 0.58477000  | 0.04696900  | N | -0.22352400 | 1.47247400  | -0.49157800 | H                        | 1.58945900  | -1.50298700 | 2.24127200  |
| C                 | -2.82152300 | 0.36222600  | 0.06606300  | C | -1.55383800 | 1.84125000  | -0.30201100 | H                        | 0.13148000  | -3.11000800 | 1.03904400  |
| H                 | -2.76695500 | 0.91306900  | 1.02485800  | C | -2.41073100 | 0.76215500  | 0.17577000  | C                        | -0.31260200 | -3.27113100 | -1.67827600 |
| H                 | -2.01199700 | -1.56532900 | 0.14004200  | C | -3.77016900 | 0.91942100  | 0.44981600  | H                        | -0.69589400 | -2.78219400 | -2.58303500 |
|                   |             |             |             | H | -4.23216600 | 1.90031900  | 0.30755200  | H                        | 0.17546900  | -4.20791300 | -1.98933000 |
|                   |             |             |             | C | -0.67094600 | 3.71803300  | -1.02777900 | H                        | -1.17430100 | -3.53843300 | -1.05319900 |
| PhNH <sub>2</sub> |             |             |             | C | -4.50609900 | -0.17596900 | 0.89606500  | C                        | 3.28992100  | 0.38771200  | 1.23363400  |
|                   |             |             |             | C | 0.44509900  | 2.65434800  | -1.01344000 | H                        | 3.95835100  | -0.25159000 | 1.84289100  |
| N                 | -2.32598300 | 0.00000700  | -0.07351200 | C | -2.51085400 | -1.55485900 | 0.78749900  | C                        | 4.16921400  | 1.27181000  | 0.36617100  |
| C                 | -0.94323800 | 0.00001200  | -0.00791200 | H | -0.44686500 | 4.57653200  | -0.37101800 | H                        | 3.56943700  | 1.95232500  | -0.25756000 |
| C                 | -0.22149500 | 1.20701900  | -0.00335600 | H | 1.29981000  | 2.93953700  | -0.37514100 | H                        | 4.81977100  | 1.89893500  | 0.99052500  |
| C                 | -0.22151700 | -1.20700400 | -0.00335900 | N | -1.87969400 | 3.05834100  | -0.57453600 | H                        | 4.81823300  | 0.68934500  | -0.30242000 |
| C                 | 1.16954700  | 1.20084600  | 0.00304700  | H | 0.86403400  | 2.45751100  | -2.01630500 | C                        | 2.45797300  | 1.22771500  | 2.19791000  |
| H                 | -0.76649300 | 2.15534800  | -0.00867500 | H | -0.83447900 | 4.15436200  | -2.02786900 | H                        | 1.86049900  | 0.61541700  | 2.88627400  |
| C                 | 1.16952600  | -1.20085800 | 0.00305800  | C | -3.87285500 | -1.41047100 | 1.06413000  | H                        | 3.10338700  | 1.87415300  | 2.80898900  |
| H                 | -0.76653100 | -2.15532400 | -0.00870600 | H | -4.44887400 | -2.27041200 | 1.41857900  | H                        | 1.75332800  | 1.86971600  | 1.64778100  |
| C                 | 1.88000000  | -0.00001300 | 0.00613700  | H | -5.57140500 | -0.07175600 | 1.11545300  | C                        | -1.73975300 | -0.47466000 | 0.33267500  |
| H                 | 1.70587700  | 2.15321500  | 0.00787000  | H | -2.05142800 | -2.53840000 | 0.94097300  | Ru                       | 0.28695300  | -0.39273000 | -0.14609800 |
| H                 | 1.70583900  | -2.15323600 | 0.00788000  | C | 1.41433300  | -1.39912500 | -1.63846100 |                          |             |             |             |
| H                 | 2.97148800  | -0.00002200 | 0.01275200  | C | 2.36503700  | -0.57382300 | -0.96819300 |                          |             |             |             |
| H                 | -2.78257300 | -0.83957900 | 0.25887000  | C | 2.42948200  | -0.57627000 | 0.44087900  | $\gamma$ -7 <sub>a</sub> |             |             |             |

|   |             |             |             |    |             |             |             |   |             |             |             |
|---|-------------|-------------|-------------|----|-------------|-------------|-------------|---|-------------|-------------|-------------|
|   |             |             |             | H  | -1.82412400 | 0.87249900  | -2.45602400 | C | 3.63311100  | 0.11243500  | 1.24390000  |
| N | -0.81808000 | -1.24640500 | 1.20412800  | H  | -3.16851600 | 0.95269400  | 1.66244700  | C | 3.95441900  | 1.32849700  | -1.23380700 |
| C | -0.15545300 | -2.26050900 | 0.71041200  | H  | -1.48529000 | 2.70883800  | 2.19614700  | H | 1.85327500  | 1.77686400  | -1.12360800 |
| C | 0.48521000  | -2.08414700 | -0.56733300 | C  | 0.41111500  | 3.74851100  | 0.52794700  | C | 4.88230300  | 0.13948300  | 0.62657300  |
| C | 1.14822400  | -3.09952500 | -1.27185000 | H  | 1.04044500  | 3.29472500  | 1.30775100  | H | 3.53713200  | -0.38734800 | 2.20968800  |
| H | 1.24283000  | -4.10314300 | -0.84434300 | H  | 1.05812500  | 3.97986600  | -0.32640000 | C | 5.06510700  | 0.74231500  | -0.61615000 |
| C | -0.77795000 | -3.00716700 | 2.77489100  | H  | 0.00464600  | 4.69238500  | 0.91940600  | H | 4.06552700  | 1.81350300  | -2.20865100 |
| C | 1.66975900  | -2.82844600 | -2.52968600 | C  | -3.73874200 | -0.23733600 | -0.73643500 | H | 5.73075300  | -0.33249500 | 1.13173600  |
| C | -1.44569200 | -1.66304100 | 2.44626200  | H  | -3.83044800 | -0.82250200 | 0.19759500  | H | 6.04646400  | 0.75749700  | -1.09474700 |
| C | 0.86893800  | -0.53941700 | -2.35481600 | C  | -5.09336300 | 0.40955800  | -1.01304300 | H | 0.23516300  | 0.60296300  | 3.04415600  |
| H | 0.01849100  | -2.89133900 | 3.53179500  | H  | -5.05806600 | 1.01699800  | -1.93034200 |   |             |             |             |
| H | -1.31198700 | -0.91364400 | 3.24125700  | H  | -5.87821900 | -0.34840200 | -1.14867100 |   |             |             |             |
| N | -0.22434200 | -3.38774800 | 1.47969700  | H  | -5.40669400 | 1.07268500  | -0.19401100 | 2 |             |             |             |
| H | -2.53624900 | -1.77677200 | 2.29913100  | C  | -3.34129800 | -1.20013500 | -1.84327100 |   |             |             |             |
| H | -1.48657700 | -3.75821700 | 3.15220700  | H  | -2.33888200 | -1.62096600 | -1.67506100 | N | 0.71191600  | 1.52114700  | 0.40891200  |
| C | 1.51505300  | -1.54727800 | -3.07011100 | H  | -4.05525600 | -2.03263500 | -1.91033100 | C | 1.95873500  | 1.21844500  | 0.17994000  |
| H | 1.91536400  | -1.33064300 | -4.06456300 | H  | -3.33604500 | -0.71077900 | -2.82914900 | C | 2.22451300  | -0.03680900 | -0.48359600 |
| H | 2.18792600  | -3.60687400 | -3.09324200 | C  | 0.33858400  | -0.76778600 | -1.07684400 | C | 3.50385300  | -0.53803800 | -0.76328000 |
| H | 0.79694900  | 0.45475400  | -2.80859500 | Ru | -0.61642500 | 0.58816300  | 0.17214100  | H | 4.39785100  | 0.01541000  | -0.45642200 |
| C | -0.82644600 | 2.30765800  | -1.15949900 | H  | 0.52482300  | -4.06656500 | 1.42957200  | C | 2.08291400  | 3.35698200  | 0.96227100  |
| C | -1.80857600 | 1.31295700  | -1.45553200 | C  | 1.20349000  | 0.32391800  | 2.59828000  | C | 3.63307800  | -1.75229600 | -1.42646100 |
| C | -2.69814100 | 0.82315500  | -0.46265900 | H  | 1.33655800  | -0.77013500 | 2.77442300  | C | 0.65168300  | 2.80564500  | 1.07597700  |
| C | -2.55150000 | 1.36751100  | 0.85732500  | H  | 1.98541400  | 0.81978600  | 3.20493900  | C | 1.21019300  | -1.93871900 | -1.53205400 |
| C | -1.60097200 | 2.35960000  | 1.16762400  | N  | 1.25612800  | 0.74118900  | 1.22927000  | H | 2.16412900  | 4.10541000  | 0.15385800  |
| C | -0.68927100 | 2.81155200  | 0.16004900  | C  | 2.49310300  | 0.70174700  | 0.63543300  | H | -0.10258700 | 3.45637400  | 0.60828100  |
| H | -0.13201400 | 2.63699900  | -1.93639400 | C  | 2.70819400  | 1.31104900  | -0.62832700 | N | 2.84767500  | 2.15285400  | 0.64413900  |

|   |             |             |             |    |             |             |             |   |             |             |             |
|---|-------------|-------------|-------------|----|-------------|-------------|-------------|---|-------------|-------------|-------------|
| H | 0.34610900  | 2.66934200  | 2.13046300  | C  | 0.50301000  | -0.84783700 | 2.91642300  | H | 0.26347300  | 4.66662100  | -0.42339800 |
| H | 2.43907900  | 3.83164100  | 1.88776500  | H  | 0.19917200  | 0.17283200  | 3.18781700  | C | -4.16224700 | -0.94739500 | -0.69386800 |
| C | 2.48002700  | -2.44465100 | -1.81404900 | H  | 0.99475800  | -1.28748100 | 3.79614000  | H | -4.88955000 | -1.75302700 | -0.83243300 |
| H | 2.57774500  | -3.39520900 | -2.34677500 | H  | 1.25198300  | -0.76423500 | 2.11379200  | H | -5.61399000 | 0.62289400  | -1.02555300 |
| H | 4.62220400  | -2.15915800 | -1.64693600 | C  | 1.03363500  | -0.72991400 | -0.83985800 | H | -2.56089700 | -2.32076100 | -0.33646800 |
| H | 0.33453800  | -2.50420700 | -1.86922700 | Ru | -0.75160700 | 0.19429400  | -0.33587500 | C | 0.30337700  | -1.85108200 | -1.46861200 |
| C | -2.41756100 | -1.02563200 | -0.96786000 | O  | -0.55242400 | 1.23742000  | -2.07721500 | C | 1.24383300  | -0.79076500 | -1.63176700 |
| C | -1.69079600 | -1.67110100 | 0.07539400  | H  | 3.74506900  | 2.24475000  | 0.18451300  | C | 2.32770400  | -0.61614800 | -0.69722800 |
| C | -1.45974800 | -1.05682900 | 1.34253200  | H  | 0.35404600  | 1.16774600  | -2.39819500 | C | 2.28573700  | -1.37444200 | 0.48207900  |
| C | -1.92554400 | 0.28362600  | 1.46467500  |    |             |             |             | C | 1.23957100  | -2.32318500 | 0.70327300  |
| C | -2.73013700 | 0.92580700  | 0.46743500  |    |             |             |             | C | 0.31422700  | -2.68212600 | -0.31177500 |
| C | -2.95346300 | 0.28812500  | -0.77038400 | 4  |             |             |             | H | -0.48709600 | -1.98164300 | -2.21274000 |
| H | -2.52208100 | -1.51295100 | -1.93941200 |    |             |             |             | H | 1.17357000  | -0.16107900 | -2.51966200 |
| H | -1.24857400 | -2.64756300 | -0.13509200 | N  | -0.09435000 | 1.55006000  | 0.41579400  | H | 3.02338500  | -1.20665000 | 1.26932500  |
| H | -1.67607000 | 0.84827300  | 2.36841900  | C  | -1.28984200 | 2.07637900  | -0.05555700 | H | 1.18938300  | -2.84774400 | 1.66269200  |
| H | -3.06235100 | 1.95520400  | 0.61661600  | C  | -2.31369000 | 1.07277700  | -0.31040600 | C | -0.59743600 | -3.85180800 | -0.13463800 |
| C | -3.55325000 | 1.01861400  | -1.92162000 | C  | -3.64157400 | 1.39800500  | -0.60169900 | H | -1.35980900 | -3.90538300 | -0.92051700 |
| H | -4.25511800 | 0.38583800  | -2.48128700 | H  | -3.91792400 | 2.45425900  | -0.66388100 | H | -0.02304600 | -4.78986200 | -0.18002700 |
| H | -4.07571200 | 1.92842500  | -1.60194600 | C  | -0.11358200 | 3.88726500  | 0.25847600  | H | -1.10861400 | -3.83282600 | 0.83812600  |
| H | -2.73482900 | 1.31225600  | -2.60068300 | C  | -4.57233200 | 0.38348800  | -0.79829400 | C | 3.50207300  | 0.29887000  | -0.99326900 |
| C | -0.66623200 | -1.71266700 | 2.45739600  | C  | 0.83066300  | 2.67544000  | 0.37717400  | H | 4.30199100  | -0.41058700 | -1.28630300 |
| H | -1.36437000 | -1.81677900 | 3.31145300  | C  | -2.83062500 | -1.26530600 | -0.41339000 | C | 3.29160800  | 1.21346300  | -2.19140200 |
| C | -0.17124500 | -3.10375500 | 2.09708900  | H  | -0.24666000 | 4.38744400  | 1.23766800  | H | 2.43440700  | 1.88908000  | -2.05868200 |
| H | 0.53291100  | -3.06619000 | 1.25047700  | H  | 1.47663800  | 2.71250000  | 1.27124800  | H | 4.17892400  | 1.83989600  | -2.35410400 |
| H | 0.36334800  | -3.55497500 | 2.94432200  | N  | -1.38988800 | 3.35705400  | -0.19019000 | H | 3.12481100  | 0.64821800  | -3.11812400 |
| H | -0.99029200 | -3.78502500 | 1.82708500  | H  | 1.50780100  | 2.61349200  | -0.49586900 | C | 4.02420000  | 1.05574200  | 0.22113800  |

|             |             |             |             |   |             |             |             |             |             |             |             |
|-------------|-------------|-------------|-------------|---|-------------|-------------|-------------|-------------|-------------|-------------|-------------|
| H           | 4.35299500  | 0.38685800  | 1.02731000  | N | -2.87339200 | 1.82849200  | 0.81150700  | H           | -0.99093300 | 1.59027000  | -2.23822000 |
| H           | 4.89468200  | 1.66663100  | -0.05443400 | H | 0.02497400  | 2.82477600  | 1.28424600  | C           | 1.62899000  | 3.63039200  | -1.18499600 |
| H           | 3.26438400  | 1.73052900  | 0.63739000  | H | -2.15516300 | 3.78011400  | 1.12161200  | H           | 2.72720900  | 3.61199500  | -1.22501800 |
| C           | -1.86896900 | -0.26393800 | -0.22085500 | C | -2.69098500 | -2.87052600 | -1.31825700 | H           | 1.29774900  | 4.54489700  | -1.69577500 |
| Ru          | 0.16279100  | -0.52285100 | 0.17165400  | H | -2.82192900 | -3.84714400 | -1.79383100 | H           | 1.33725600  | 3.73343200  | -0.12837300 |
| C           | 0.47325200  | -0.19374000 | 3.38202700  | H | -4.80336500 | -2.39700500 | -1.37802300 | C           | -1.20238600 | -1.20929100 | -0.33182700 |
| H           | 0.71429800  | -1.24205000 | 3.59991500  | H | -0.56597500 | -3.11732000 | -1.14270000 | Ru          | 0.64210100  | -0.36696400 | 0.14710800  |
| H           | 0.09908300  | 0.26391100  | 4.31166200  | C | 1.63367400  | -1.37429200 | -1.45634100 | C           | 1.22631000  | -1.13598700 | 2.98772700  |
| H           | 1.40338000  | 0.32278600  | 3.08467000  | C | 1.17491600  | -0.11524600 | -1.93886600 | H           | 1.49419500  | -0.06595100 | 3.17422400  |
| O           | -0.50713300 | -0.15964000 | 2.37017800  | C | 1.50889000  | 1.08677000  | -1.26593600 | H           | 2.19306000  | -1.65970400 | 2.81602500  |
| H           | -0.58736500 | 0.77026300  | 2.04032700  | C | 2.39772500  | 1.00287000  | -0.13542400 | H           | 0.84520200  | -1.53060300 | 3.95095600  |
|             |             |             |             | C | 2.86559400  | -0.23357700 | 0.32760800  | O           | 0.29140400  | -1.31878000 | 1.99490000  |
|             |             |             |             | C | 2.44620900  | -1.46233600 | -0.29614500 | H           | -0.71672500 | 0.11042000  | 1.96704800  |
| $\alpha$ -5 |             |             |             | H | 1.28032000  | -2.29329100 | -1.93042400 |             |             |             |             |
|             |             |             |             | H | 0.48618000  | -0.08333600 | -2.78731200 |             |             |             |             |
| N           | -0.81737000 | 0.88292900  | 1.26670500  | H | 2.65758600  | 1.90807800  | 0.41888900  | $\alpha$ -6 |             |             |             |
| C           | -2.11916900 | 0.81017900  | 0.65530400  | H | 3.46023300  | -0.27511300 | 1.24368700  |             |             |             |             |
| C           | -2.35265300 | -0.43091700 | -0.06112400 | C | 2.84892600  | -2.79275300 | 0.24550000  | N           | -0.55680900 | -0.32687800 | 1.61618300  |
| C           | -3.63776800 | -0.83951300 | -0.44342800 | H | 2.07490000  | -3.54684600 | 0.05246200  | C           | -1.90988300 | -0.05804200 | 1.16486100  |
| H           | -4.48744700 | -0.18762800 | -0.22268800 | H | 3.78366900  | -3.14162400 | -0.22030400 | C           | -2.17203800 | -0.49645200 | -0.19485400 |
| C           | -2.15823900 | 2.79659600  | 1.61988900  | H | 3.01290000  | -2.75616800 | 1.32916300  | C           | -3.46478200 | -0.63448200 | -0.71442800 |
| C           | -3.80705200 | -2.06243000 | -1.07995500 | C | 1.00601900  | 2.40532000  | -1.83242400 | H           | -4.32257600 | -0.43512700 | -0.06660300 |
| C           | -0.73374300 | 2.23952100  | 1.82650300  | H | 1.33865500  | 2.39859800  | -2.88762000 | C           | -1.91467800 | 0.77016000  | 3.20938200  |
| C           | -1.41172000 | -2.44847200 | -0.95240600 | C | -0.51407500 | 2.49811100  | -1.84202700 | C           | -3.63062000 | -1.01687800 | -2.04056400 |
| H           | -2.69447600 | 2.95107600  | 2.57246500  | H | -0.90915700 | 2.64717400  | -0.82762100 | C           | -0.45273800 | 0.43599700  | 2.87380300  |
| H           | -0.41985300 | 2.20347900  | 2.87835900  | H | -0.85417000 | 3.34763600  | -2.45092500 | C           | -1.21834400 | -1.09857900 | -2.31479400 |

|   |             |             |             |                          |             |             |             |   |             |             |             |
|---|-------------|-------------|-------------|--------------------------|-------------|-------------|-------------|---|-------------|-------------|-------------|
| H | -2.32352000 | 0.12032800  | 4.00287400  | H                        | -1.64639400 | 2.08855600  | -0.84177000 | C | 0.21955500  | -0.01722000 | -2.95550000 |
| H | 0.06251000  | -0.16594800 | 3.63366800  | H                        | -1.55627900 | 3.62597300  | -1.72299400 | C | -0.37271300 | -0.78483300 | 2.42255200  |
| N | -2.66783700 | 0.55637100  | 1.98637000  | H                        | -0.91092500 | 2.14831500  | -2.44762900 | H | -1.60161700 | -0.72710200 | -3.98399700 |
| H | 0.14141700  | 1.34806500  | 2.71177700  | C                        | 0.08617200  | 3.74096300  | 0.47602300  | H | 0.09621200  | 0.94315400  | -3.47395900 |
| H | -2.04484800 | 1.80255500  | 3.56931500  | H                        | 1.01447400  | 4.10222200  | 0.93998400  | N | -1.18927200 | -1.80542900 | -2.23805800 |
| C | -2.50451300 | -1.25698200 | -2.83422500 | H                        | -0.55828600 | 4.61580100  | 0.31743500  | H | 1.27344100  | -0.31960200 | -3.05471700 |
| H | -2.63269000 | -1.56871100 | -3.87509000 | H                        | -0.43030300 | 3.09193200  | 1.20231600  | H | -0.24249700 | -1.83669900 | -4.12083700 |
| H | -4.63269600 | -1.13425000 | -2.45926600 | C                        | -1.01866600 | -0.70771600 | -0.98342400 | C | -1.34251300 | -1.65907600 | 2.91691600  |
| H | -0.35928300 | -1.28452100 | -2.96934500 | Ru                       | 0.79221500  | -0.27240800 | -0.06558200 | H | -1.46301400 | -1.77815500 | 3.99775700  |
| C | 2.25951900  | -0.25621100 | -1.65572100 | C                        | 0.42586500  | -3.10874000 | 0.90306600  | H | -2.91589900 | -3.06792600 | 2.44261100  |
| C | 1.41091700  | 0.87426800  | -1.76502600 | H                        | 0.71366800  | -2.04474300 | 0.25320000  | H | 0.25423300  | -0.23547900 | 3.13431100  |
| C | 1.21805300  | 1.79428300  | -0.68740400 | H                        | -0.06168300 | -3.62431700 | 0.03539100  | C | 2.59771700  | 1.25293700  | 1.64351800  |
| C | 1.93552800  | 1.49963500  | 0.51473700  | H                        | 1.48423500  | -3.46492200 | 1.01346600  | C | 2.73027200  | -0.14428600 | 1.44427400  |
| C | 2.82362500  | 0.40349300  | 0.63960500  | O                        | -0.26064400 | -2.87513300 | 1.95265700  | C | 2.99621900  | -0.71049100 | 0.15623400  |
| C | 2.94013700  | -0.53030900 | -0.42647300 | H                        | -0.51399100 | -1.38238900 | 1.85231400  | C | 3.12123100  | 0.22409800  | -0.91915000 |
| H | 2.33196800  | -0.96349900 | -2.48502100 |                          |             |             |             | C | 3.04345800  | 1.62872700  | -0.73577000 |
| H | 0.82949800  | 0.99682700  | -2.68318900 |                          |             |             |             | C | 2.71862800  | 2.15787700  | 0.53989900  |
| H | 1.76360200  | 2.12141100  | 1.39664500  | $\alpha$ -8 <sub>b</sub> |             |             |             | H | 2.33177700  | 1.63619900  | 2.63151100  |
| H | 3.32102900  | 0.20880100  | 1.59196000  |                          |             |             |             | H | 2.52847500  | -0.80568400 | 2.28947600  |
| C | 3.75876500  | -1.76914200 | -0.27575700 | N                        | -0.12236100 | 0.12908300  | -1.52844000 | H | 3.25516600  | -0.15408300 | -1.93598000 |
| H | 3.34876700  | -2.59720700 | -0.86868300 | C                        | -0.85589200 | -1.09359400 | -1.23333400 | H | 3.11791300  | 2.29514600  | -1.59787800 |
| H | 4.78900700  | -1.59606400 | -0.62295500 | C                        | -1.05587600 | -1.32955500 | 0.18450100  | C | 2.50788000  | 3.62254200  | 0.73955400  |
| H | 3.81215900  | -2.09324300 | 0.77125400  | C                        | -2.01570600 | -2.22377100 | 0.67309200  | H | 1.73201400  | 3.82000500  | 1.49127900  |
| C | 0.32323600  | 3.01109200  | -0.83648300 | H                        | -2.64648600 | -2.76609700 | -0.03616900 | H | 3.43304100  | 4.10079500  | 1.09617800  |
| H | 0.87760700  | 3.70098400  | -1.50398600 | C                        | -0.72973500 | -1.12601700 | -3.43536400 | H | 2.21765000  | 4.12403200  | -0.19224300 |
| C | -1.01159600 | 2.69759900  | -1.50209000 | C                        | -2.16068000 | -2.38572500 | 2.04587600  | C | 3.12940600  | -2.20445700 | -0.06956300 |



|    |             |             |             |             |             |             |             |    |             |             |             |
|----|-------------|-------------|-------------|-------------|-------------|-------------|-------------|----|-------------|-------------|-------------|
| H  | 4.21619700  | -2.39599400 | -0.17740200 | H           | -4.52360100 | 0.47941800  | 2.55146300  | C  | 1.35921700  | -0.56029800 | 1.33089800  |
| C  | 2.63119800  | -3.02945500 | 1.10787300  | H           | -6.09159700 | -0.56426700 | 0.91526100  | C  | 2.01118900  | -1.21322000 | 0.24588600  |
| H  | 1.56729400  | -2.82940500 | 1.31309400  |             |             |             |             | C  | 2.76740200  | -0.52942800 | -0.74267600 |
| H  | 2.72886500  | -4.10163000 | 0.89155000  |             |             |             |             | C  | 2.77909900  | 0.89358500  | -0.74966600 |
| H  | 3.19665800  | -2.83723900 | 2.02982800  | $\alpha$ -7 |             |             |             | H  | 2.10861200  | 2.68092400  | 0.32323700  |
| C  | 2.45410500  | -2.66708400 | -1.35501100 |             |             |             |             | H  | 0.82700900  | 1.42917900  | 2.04599300  |
| H  | 2.83847600  | -2.16294900 | -2.25269000 | N           | -0.78329400 | -1.07436900 | -1.55256500 | H  | 1.92233200  | -2.30341400 | 0.17153300  |
| H  | 2.61455400  | -3.74297200 | -1.50757900 | C           | -2.04608400 | -0.93867300 | -0.82468100 | H  | 3.25480400  | -1.08528100 | -1.54595200 |
| H  | 1.36577100  | -2.50348400 | -1.31103000 | C           | -2.27812500 | 0.39251300  | -0.30371500 | C  | 3.49028700  | 1.65313600  | -1.82132600 |
| C  | -0.20659700 | -0.59315300 | 1.04318300  | C           | -3.54388400 | 0.80809600  | 0.13656100  | H  | 3.51641000  | 1.09019100  | -2.76268700 |
| Ru | 1.22875400  | 0.58062300  | 0.10976100  | H           | -4.38404100 | 0.11134500  | 0.06944500  | H  | 3.00194300  | 2.61568300  | -2.01741000 |
| C  | -0.95084500 | 2.67133500  | -0.04011600 | C           | -2.05397700 | -3.06070200 | -1.44706400 | H  | 4.53043700  | 1.86091400  | -1.52632800 |
| H  | -0.14879200 | 1.85656800  | 0.38602600  | C           | -3.70359700 | 2.08794300  | 0.64979600  | C  | 0.62134600  | -1.36031300 | 2.37974600  |
| H  | -1.28955000 | 3.08794100  | 0.92843000  | C           | -0.63903800 | -2.53202200 | -1.71796900 | H  | 0.16649600  | -2.21970800 | 1.84930500  |
| H  | -0.29382600 | 3.39774700  | -0.54493400 | C           | -1.33550100 | 2.51455100  | 0.29421600  | C  | 1.59573300  | -1.92061700 | 3.41329000  |
| H  | -0.84843200 | 0.92741600  | -1.44154900 | H           | -2.60970800 | -3.28818800 | -2.37529300 | H  | 2.08902100  | -1.10758200 | 3.96785500  |
| N  | -1.86506900 | 2.09839100  | -0.87698800 | H           | -0.23003700 | -2.77846900 | -2.70555100 | H  | 1.07920400  | -2.55572500 | 4.14767100  |
| C  | -2.95465400 | 1.44677200  | -0.33699700 | N           | -2.73892100 | -2.00547800 | -0.72364500 | H  | 2.38725400  | -2.52416800 | 2.94641900  |
| C  | -3.85537300 | 0.83749600  | -1.24399100 | H           | 0.07291000  | -2.89959100 | -0.96394700 | C  | -0.50525300 | -0.58655000 | 3.04593400  |
| C  | -3.23305600 | 1.30006300  | 1.04351600  | H           | -2.04949500 | -3.99484200 | -0.86581000 | H  | -1.19064200 | -0.13971200 | 2.31057000  |
| C  | -4.96335200 | 0.12846900  | -0.80189200 | C           | -2.59363100 | 2.93969300  | 0.71843300  | H  | -1.09501800 | -1.24436600 | 3.69894100  |
| H  | -3.64724600 | 0.94397400  | -2.31266200 | H           | -2.71587400 | 3.95268800  | 1.11374000  | H  | -0.11959600 | 0.22580900  | 3.68099800  |
| C  | -4.34624200 | 0.58896300  | 1.47750100  | H           | -4.68303900 | 2.42930200  | 0.99196500  | C  | -1.13039900 | 1.22276700  | -0.22080200 |
| H  | -2.55084800 | 1.71757400  | 1.78783000  | H           | -0.49022100 | 3.20655100  | 0.37299200  | Ru | 0.67799800  | 0.31823600  | -0.64881600 |
| C  | -5.22256300 | -0.00264200 | 0.56548300  | C           | 2.11596800  | 1.58883000  | 0.31174000  | H  | 0.43689900  | 1.13882300  | -2.04011700 |
| H  | -5.63582600 | -0.33045000 | -1.53177700 | C           | 1.40334300  | 0.86136700  | 1.30967300  | H  | -0.88664800 | -0.60778200 | -2.45582700 |

|             |             |             |             |    |             |             |             |             |             |             |             |
|-------------|-------------|-------------|-------------|----|-------------|-------------|-------------|-------------|-------------|-------------|-------------|
|             |             |             |             | C  | 2.75952100  | -0.74243900 | 0.74524400  | O           | 0.51211500  | -1.82427400 | -1.48021400 |
|             |             |             |             | C  | 2.95811000  | -0.52835300 | -0.63455800 | H           | -3.77398000 | -1.84108900 | 0.94292200  |
| $\gamma$ -5 |             |             |             | H  | 2.53099000  | 0.83170900  | -2.29664000 |             |             |             |             |
|             |             |             |             | H  | 1.34048700  | 2.51062200  | -0.90489900 |             |             |             |             |
| N           | -0.71759900 | -1.20219600 | 0.96016700  | H  | 1.77398500  | -0.04497800 | 2.55271800  | $\gamma$ -6 |             |             |             |
| C           | -1.95862000 | -0.91387700 | 0.68417700  | H  | 3.07751900  | -1.68284500 | 1.20024800  |             |             |             |             |
| C           | -2.20051700 | 0.12583500  | -0.28779200 | C  | 3.50283600  | -1.60116200 | -1.51068600 | N           | -1.01424500 | -1.45541700 | 0.50162700  |
| C           | -3.46867400 | 0.59677200  | -0.65326900 | H  | 4.14859200  | -1.19431200 | -2.29996700 | C           | -2.20557700 | -0.91771300 | 0.43788200  |
| H           | -4.36717800 | 0.22023700  | -0.15263800 | H  | 4.06703700  | -2.34968100 | -0.94114000 | C           | -2.33832000 | 0.31510800  | -0.29067500 |
| C           | -2.14308900 | -2.80249800 | 1.94986400  | H  | 2.64559200  | -2.10647000 | -1.98940700 | C           | -3.53159400 | 1.04135600  | -0.42310400 |
| C           | -3.58022900 | 1.55466900  | -1.65404000 | C  | 0.83479300  | 2.45176700  | 1.86459700  | H           | -4.45125300 | 0.68883300  | 0.05668500  |
| C           | -0.68337800 | -2.31746000 | 1.88453200  | H  | 1.58015500  | 2.80392400  | 2.60513100  | C           | -2.59832800 | -2.93079600 | 1.43338400  |
| C           | -1.16143000 | 1.54987300  | -1.91089500 | C  | 0.34070000  | 3.66706400  | 1.09711500  | C           | -3.53931700 | 2.22161300  | -1.15375100 |
| H           | -2.29151700 | -3.72020900 | 1.35380500  | H  | -0.40200700 | 3.37906700  | 0.33575200  | C           | -1.09235500 | -2.65750700 | 1.31198100  |
| H           | 0.01247700  | -3.09378400 | 1.52962300  | H  | -0.14822200 | 4.37941500  | 1.77581900  | C           | -1.16971100 | 1.92873900  | -1.62538800 |
| N           | -2.86889100 | -1.67627900 | 1.36591300  | H  | 1.15458000  | 4.20472900  | 0.59076900  | H           | -2.92927100 | -3.69370000 | 0.70501000  |
| H           | -0.31384000 | -1.98502800 | 2.87244300  | C  | -0.31947500 | 1.81841300  | 2.63374500  | H           | -0.53678600 | -3.48863700 | 0.85287800  |
| H           | -2.48175200 | -3.01655100 | 2.97389500  | H  | -0.02006200 | 0.92533500  | 3.19964500  | N           | -3.16540900 | -1.62190200 | 1.12437400  |
| C           | -2.42097000 | 2.02075100  | -2.28459100 | H  | -0.74858400 | 2.53171500  | 3.35191700  | H           | -0.63014600 | -2.47585600 | 2.30057600  |
| H           | -2.50542800 | 2.76318000  | -3.08370400 | H  | -1.11775700 | 1.51408600  | 1.93973900  | H           | -2.89515300 | -3.27974800 | 2.43286600  |
| H           | -4.56047100 | 1.93532500  | -1.94857200 | C  | -1.00305600 | 0.59815800  | -0.89109700 | C           | -2.35079500 | 2.65649700  | -1.75607300 |
| H           | -0.28288100 | 1.92912300  | -2.44435900 | Ru | 0.76257900  | -0.22981200 | -0.19231200 | H           | -2.35257000 | 3.58338000  | -2.33778000 |
| C           | 2.43996200  | 0.67079500  | -1.22035700 | C  | -0.68057500 | -2.24111600 | -2.00071500 | H           | -4.45817400 | 2.80211800  | -1.25996800 |
| C           | 1.76683600  | 1.63368200  | -0.41276500 | H  | -0.51445900 | -3.12667900 | -2.64786500 | H           | -0.26849700 | 2.30077100  | -2.12530800 |
| C           | 1.56095800  | 1.44924300  | 0.98744600  | H  | -1.20048700 | -1.48692200 | -2.63476300 | C           | 2.22993600  | 0.49207200  | -1.44853900 |
| C           | 2.00489500  | 0.20118100  | 1.51197700  | H  | -1.43932600 | -2.57247300 | -1.24716400 | C           | 1.85535200  | 1.24274400  | -0.29697800 |

|    |             |             |             |                          |             |             |             |    |             |             |             |
|----|-------------|-------------|-------------|--------------------------|-------------|-------------|-------------|----|-------------|-------------|-------------|
| C  | 1.84989700  | 0.67826700  | 1.01564600  |                          |             |             |             | C  | 0.99325200  | -2.37224600 | -1.00665500 |
| C  | 2.09442600  | -0.71437000 | 1.09185200  |                          |             |             |             | C  | 0.69666700  | -1.55818300 | -2.13308700 |
| C  | 2.47037300  | -1.50063000 | -0.03701800 | $\alpha$ -8 <sub>a</sub> |             |             |             | H  | 1.17074600  | 0.35023200  | -3.09053000 |
| C  | 2.51623700  | -0.90465900 | -1.32511500 |                          |             |             |             | H  | 2.96119600  | 0.95587900  | -1.48187300 |
| H  | 2.24066500  | 0.96626900  | -2.43228900 | N                        | 0.62304600  | 1.56471400  | 0.81137000  | H  | 2.36558100  | -2.76599000 | 0.64381400  |
| H  | 1.56573500  | 2.29064800  | -0.43017400 | C                        | -0.17001600 | 2.52845600  | 0.08262300  | H  | 0.39053300  | -3.26460700 | -0.81645400 |
| H  | 1.98274000  | -1.20983800 | 2.06225600  | C                        | -1.24468400 | 1.93784800  | -0.69015000 | C  | -0.32396700 | -1.96949000 | -3.13975500 |
| H  | 2.66021900  | -2.56979400 | 0.07671000  | C                        | -2.34841300 | 2.68950600  | -1.11913100 | H  | -0.84438800 | -1.11117300 | -3.58181300 |
| C  | 2.85871400  | -1.71361600 | -2.53383800 | H                        | -2.35771500 | 3.76676600  | -0.93228400 | H  | 0.17861900  | -2.50765000 | -3.95892100 |
| H  | 2.58116300  | -2.76732200 | -2.40494400 | C                        | 1.28652200  | 3.80701900  | 1.13844200  | H  | -1.07236500 | -2.65124300 | -2.71661200 |
| H  | 2.34353900  | -1.33567600 | -3.42568300 | C                        | -3.41115900 | 2.05109800  | -1.74391400 | C  | 4.14001800  | -0.70592100 | 0.48653200  |
| H  | 3.94079100  | -1.67505900 | -2.73380300 | C                        | 1.73884700  | 2.35233300  | 1.35440300  | H  | 4.76167300  | -1.60508400 | 0.31486600  |
| C  | 1.51628900  | 1.50284900  | 2.23758200  | C                        | -2.25635300 | -0.07348500 | -1.50876800 | C  | 4.97595000  | 0.48332300  | 0.04147300  |
| H  | 1.46250200  | 0.79731000  | 3.08664700  | H                        | 0.95414200  | 4.28956300  | 2.07512300  | H  | 4.46814900  | 1.44343100  | 0.21750200  |
| C  | 2.63324000  | 2.49980700  | 2.53360400  | H                        | 1.92611300  | 2.09108800  | 2.40431800  | H  | 5.92034500  | 0.51827500  | 0.60129500  |
| H  | 2.73013300  | 3.23792200  | 1.72229700  | N                        | 0.17694000  | 3.75125000  | 0.20734500  | H  | 5.22981100  | 0.43531300  | -1.02658800 |
| H  | 2.43591300  | 3.05832400  | 3.46017300  | H                        | 2.65617900  | 2.12730200  | 0.78909500  | C  | 3.84334500  | -0.65602700 | 1.97994000  |
| H  | 3.60772700  | 2.00303000  | 2.64148400  | H                        | 2.09309700  | 4.44479800  | 0.74599900  | H  | 3.37406400  | -1.58145600 | 2.33972500  |
| C  | 0.16488600  | 2.19754400  | 2.12885000  | C                        | -3.36713200 | 0.66340000  | -1.91761600 | H  | 4.76595800  | -0.51393000 | 2.56042400  |
| H  | -0.64921400 | 1.47312600  | 1.98594200  | H                        | -4.22088200 | 0.14539500  | -2.36429800 | H  | 3.16048700  | 0.17076900  | 2.22478300  |
| H  | -0.05123300 | 2.78586000  | 3.03274500  | H                        | -4.28272500 | 2.62115400  | -2.07344000 | C  | -1.15153000 | 0.54408400  | -0.90622300 |
| H  | 0.12837800  | 2.89001600  | 1.27358600  | H                        | -2.28360500 | -1.16031000 | -1.61870300 | Ru | 0.60946500  | -0.36941200 | -0.29800000 |
| C  | -1.10842400 | 0.74058000  | -0.87388400 | C                        | 1.44515800  | -0.35045700 | -2.29877100 | C  | 0.17379600  | -1.95042400 | 2.24199300  |
| Ru | 0.53403500  | -0.43697800 | -0.48782300 | C                        | 2.46079800  | -0.00970100 | -1.37457600 | H  | 0.17784400  | -2.92141400 | 1.69956900  |
| H  | -0.10338400 | -1.11239200 | -1.81646600 | C                        | 2.89673500  | -0.93303900 | -0.35831600 | H  | -0.32696000 | -2.14579300 | 3.20797800  |
| H  | -4.12334400 | -1.56862900 | 0.80023700  | C                        | 2.12545600  | -2.08635300 | -0.17817700 | H  | 1.22523400  | -1.71316700 | 2.46424200  |

|                          |             |             |             |   |             |             |             |    |             |             |             |
|--------------------------|-------------|-------------|-------------|---|-------------|-------------|-------------|----|-------------|-------------|-------------|
| H                        | 0.07399100  | 1.05074100  | 1.53356500  | H | 1.69800300  | -0.67989600 | 3.54719100  | H  | -5.48295300 | -1.51597600 | -1.30894800 |
| N                        | -0.44737600 | -0.84315900 | 1.55058500  | H | -0.58178200 | -0.02449800 | 3.34990400  | H  | -5.56997800 | -2.87163100 | -0.16810800 |
| C                        | -4.03242800 | 0.13932900  | 1.64283800  | N | 1.54334400  | -1.98717500 | 1.90115800  | H  | -5.76666500 | -1.20531400 | 0.41288400  |
| C                        | -2.64541000 | 0.19834100  | 1.69482800  | H | -1.14473700 | -1.68355400 | 3.07865000  | C  | -2.94338100 | -2.67383200 | -1.01405500 |
| C                        | -1.84803900 | -0.95182800 | 1.52522900  | H | 1.02677800  | -2.29807000 | 3.94461800  | H  | -1.85566200 | -2.57550200 | -0.88496800 |
| C                        | -2.52341900 | -2.17715900 | 1.35384600  | C | 1.47159700  | -0.85092800 | -3.17783300 | H  | -3.21699700 | -3.72192300 | -0.83048300 |
| C                        | -3.91525500 | -2.23767300 | 1.30981800  | H | 1.61495800  | -0.70039100 | -4.25191600 | H  | -3.17402200 | -2.46910200 | -2.07055300 |
| C                        | -4.68221500 | -1.08093800 | 1.44420900  | H | 3.20043300  | -2.14125600 | -2.98570200 | C  | 0.19364800  | -0.38646600 | -1.15199900 |
| H                        | -4.61374100 | 1.05713900  | 1.76663000  | H | -0.25370000 | 0.42542300  | -3.11489500 | Ru | -1.25094600 | 0.49605200  | 0.04626600  |
| H                        | -2.15101600 | 1.15863900  | 1.86825800  | C | -2.36240500 | 1.63900700  | -1.42032500 | H  | 2.55145700  | -1.98687500 | 1.76224800  |
| H                        | -1.94432500 | -3.09655100 | 1.23061700  | C | -2.83251400 | 0.29579800  | -1.38208800 | C  | 1.21260400  | 1.94968800  | 1.22115000  |
| H                        | -4.40703100 | -3.20413200 | 1.16558000  | C | -3.25204900 | -0.30960000 | -0.16021400 | H  | 0.59996800  | 2.29221100  | 2.07214900  |
| H                        | -5.77285600 | -1.13039300 | 1.40883400  | C | -3.23619500 | 0.51024300  | 1.01725200  | H  | 1.47728000  | 2.81853800  | 0.58194600  |
|                          |             |             |             | C | -2.77668600 | 1.84006700  | 0.99559400  | N  | 2.19241000  | 1.07604900  | 1.58439300  |
|                          |             |             |             | C | -2.26697500 | 2.40258100  | -0.22166600 | C  | 3.22554200  | 0.83514700  | 0.72677500  |
| $\gamma$ -7 <sub>b</sub> |             |             |             | H | -1.97194900 | 2.05306100  | -2.35278700 | C  | 3.33542200  | 1.31555900  | -0.60629600 |
|                          |             |             |             | H | -2.77764100 | -0.30803700 | -2.29175900 | C  | 4.27869700  | 0.00071800  | 1.19111100  |
| N                        | -0.27409000 | -0.76310200 | 1.38918300  | H | -3.50219800 | 0.05344200  | 1.97607100  | C  | 4.42512900  | 0.98493800  | -1.40155000 |
| C                        | 0.82410400  | -1.33410500 | 0.94529300  | H | -2.70003800 | 2.40672000  | 1.92682100  | H  | 2.53185300  | 1.92325100  | -1.03100300 |
| C                        | 1.10255600  | -1.23513600 | -0.46563600 | C | -1.67103600 | 3.77232500  | -0.23307600 | C  | 5.36601000  | -0.31952600 | 0.38772800  |
| C                        | 2.17658600  | -1.86188300 | -1.10889000 | H | -1.16759600 | 4.00148100  | 0.71548000  | H  | 4.22388100  | -0.35013600 | 2.22720000  |
| H                        | 2.87125500  | -2.49208100 | -0.54497600 | H | -0.93830400 | 3.88578000  | -1.04239200 | C  | 5.45340200  | 0.17015000  | -0.91855900 |
| C                        | 1.05174600  | -1.49873300 | 3.19047700  | H | -2.44970000 | 4.53650300  | -0.38171500 | H  | 4.46814100  | 1.35906200  | -2.42909000 |
| C                        | 2.36138900  | -1.66717100 | -2.47203200 | C | -3.70311100 | -1.74912600 | -0.07632000 | H  | 6.16350800  | -0.95334000 | 0.78667800  |
| C                        | -0.34173800 | -0.96454600 | 2.82794200  | H | -3.48830600 | -2.07439000 | 0.95848200  | H  | 6.30634900  | -0.08291900 | -1.55205600 |
| C                        | 0.40996000  | -0.21950400 | -2.52810300 | C | -5.21140300 | -1.83988300 | -0.29244800 | H  | 0.37291400  | 1.43801000  | 0.50878600  |

|              |             |             |             |    |             |             |             |   |             |             |             |
|--------------|-------------|-------------|-------------|----|-------------|-------------|-------------|---|-------------|-------------|-------------|
|              |             |             |             | C  | 2.81170500  | -0.47122900 | 2.14186600  | N | -2.39245800 | 0.28122500  | 1.26266200  |
|              |             |             |             | C  | 2.11716600  | -1.69101700 | 1.84984700  | C | -4.53484900 | 2.96857500  | 1.12327200  |
| $\gamma-7_c$ |             |             |             | H  | 1.62069000  | -3.12851200 | 0.28706900  | H | -4.12861000 | 3.33570500  | 2.08706900  |
|              |             |             |             | H  | 2.67483700  | -1.80490000 | -1.54930800 | H | -5.27548600 | 2.18291400  | 1.36428900  |
| N            | 0.65654700  | 1.76477200  | 0.24503900  | H  | 3.81967500  | 1.25560200  | 1.31452500  | H | -5.08527300 | 3.80331100  | 0.66425600  |
| C            | -0.40327200 | 1.92443300  | -0.52123800 | H  | 2.78218000  | -0.06180700 | 3.15422700  | O | -3.55225200 | 2.52333500  | 0.24251700  |
| C            | -0.81703800 | 0.79355900  | -1.31758600 | C  | 1.39427200  | -2.42180000 | 2.93345900  | H | -3.11358900 | 1.70868300  | 0.64493500  |
| C            | -1.85877500 | 0.81976600  | -2.25433100 | H  | 0.92363400  | -1.73002000 | 3.64501200  | C | -2.86099400 | -0.87947800 | 0.71543500  |
| H            | -2.44376200 | 1.73203300  | -2.40161300 | H  | 0.61575900  | -3.08207700 | 2.53087300  | C | -2.27009600 | -2.15796300 | 0.90690400  |
| C            | -0.35353500 | 3.83748900  | 0.68170600  | H  | 2.09293600  | -3.05033900 | 3.50723600  | C | -3.99611800 | -0.81353300 | -0.13579500 |
| C            | -2.15189900 | -0.33108600 | -2.97369600 | C  | 3.98744200  | 0.66072700  | -1.35445700 | C | -2.78910600 | -3.28685200 | 0.28451800  |
| C            | 0.92210400  | 3.02001300  | 0.92695200  | H  | 3.93835900  | 1.70490700  | -0.99386000 | H | -1.37662800 | -2.25675900 | 1.52751800  |
| C            | -0.37087100 | -1.51226700 | -1.82065000 | C  | 5.45891400  | 0.29560900  | -1.53268700 | C | -4.50831100 | -1.94927000 | -0.74307600 |
| H            | -1.04392000 | 3.78481300  | 1.54443900  | H  | 5.56665500  | -0.74274800 | -1.88204700 | H | -4.44373400 | 0.16813200  | -0.31300100 |
| H            | 1.13687500  | 2.86169100  | 1.99610000  | H  | 5.94242200  | 0.94528200  | -2.27596800 | C | -3.90920600 | -3.19808700 | -0.54449100 |
| N            | -0.94891400 | 3.16899200  | -0.47236700 | H  | 6.02200100  | 0.38531900  | -0.59280000 | H | -2.30697500 | -4.25654500 | 0.44272000  |
| H            | 1.81507400  | 3.51118000  | 0.49569800  | C  | 3.22669300  | 0.59331500  | -2.66900900 | H | -5.38293100 | -1.86228400 | -1.39389900 |
| H            | -0.15549900 | 4.90038800  | 0.48363900  | H  | 2.16015600  | 0.82350300  | -2.53197300 | H | -4.31303200 | -4.09059200 | -1.02794200 |
| C            | -1.40172500 | -1.49339100 | -2.75886400 | H  | 3.64180400  | 1.30785400  | -3.39296100 | H | -0.32111900 | -0.14401400 | 1.50243900  |
| H            | -1.64056600 | -2.40218400 | -3.31849800 | H  | 3.29490600  | -0.40156400 | -3.13461500 |   |             |             |             |
| H            | -2.96954700 | -0.33269400 | -3.69794500 | C  | -0.05392200 | -0.37654900 | -1.06149300 |   |             |             |             |
| H            | 0.16867900  | -2.45202800 | -1.65764900 | Ru | 1.34349600  | -0.19806100 | 0.45492700  | I |             |             |             |
| C            | 2.15704700  | -2.20602200 | 0.52232900  | H  | -1.97694200 | 3.19735500  | -0.51369800 |   |             |             |             |
| C            | 2.76494400  | -1.45060900 | -0.51898200 | C  | -1.30428400 | 0.18880200  | 2.09201600  | N | 0.66331200  | 1.30040900  | 0.89909000  |
| C            | 3.37533100  | -0.18469700 | -0.26204100 | H  | -1.02697900 | 1.15097600  | 2.55223000  | C | 1.91533200  | 1.15310400  | 0.56661900  |
| C            | 3.40398000  | 0.26567900  | 1.09991800  | H  | -1.32767900 | -0.60220800 | 2.87027600  | C | 2.23676100  | 0.09047700  | -0.35432900 |

|   |             |             |             |     |             |             |             |   |             |             |             |
|---|-------------|-------------|-------------|-----|-------------|-------------|-------------|---|-------------|-------------|-------------|
| C | 3.53315300  | -0.26941300 | -0.74510500 | H   | -4.68560900 | 0.77115300  | -1.69505600 | C | -2.78088300 | -0.62439600 | 2.45694000  |
| H | 4.40346800  | 0.23400700  | -0.31130100 | H   | -3.97958100 | 2.15097000  | -0.81687700 | C | -1.69291700 | 3.58393000  | -1.36168400 |
| C | 1.91549300  | 3.13440700  | 1.69372200  | H   | -3.15604400 | 1.50005200  | -2.24452000 | C | -1.39269200 | -1.22416000 | 2.17634300  |
| C | 3.70800900  | -1.27811800 | -1.68493300 | C   | -0.49084000 | -2.47234000 | 1.91773400  | C | 0.18537400  | 2.10540400  | -1.80200700 |
| C | 0.52977000  | 2.46751700  | 1.74833200  | H   | -1.17311900 | -2.86036800 | 2.70003300  | H | -3.60036600 | -1.35339700 | 2.36564300  |
| C | 1.29410300  | -1.53419400 | -1.84331400 | C   | 0.05549200  | -3.66574200 | 1.15147100  | H | -1.44596800 | -2.15561700 | 1.57412900  |
| H | 1.91219000  | 4.01372500  | 1.02674400  | H   | 0.73634600  | -3.34275300 | 0.34787100  | N | -2.92891600 | 0.46330000  | 1.48523200  |
| H | -0.27430500 | 3.12285000  | 1.37971500  | H   | 0.62931800  | -4.32195300 | 1.81997800  | H | -0.83529300 | -1.47781800 | 3.09307300  |
| N | 2.75162400  | 2.06740500  | 1.14551100  | H   | -0.73911900 | -4.27614500 | 0.69994000  | H | -2.83706500 | -0.22080800 | 3.48290600  |
| H | 0.25573200  | 2.16542700  | 2.77631100  | C   | 0.64504800  | -1.73439500 | 2.61738900  | C | -0.55658400 | 3.25019200  | -2.10427500 |
| H | 2.27452300  | 3.46525800  | 2.67886200  | H   | 0.30327000  | -0.85900300 | 3.18675600  | H | -0.25026500 | 3.88766300  | -2.93907500 |
| C | 2.58269900  | -1.89929800 | -2.23697300 | H   | 1.16528400  | -2.39903400 | 3.32151700  | H | -2.26948000 | 4.47714400  | -1.61325500 |
| H | 2.71543200  | -2.68074500 | -2.99083200 | H   | 1.38019800  | -1.37850900 | 1.87981700  | H | 1.04645400  | 1.86114400  | -2.43416300 |
| H | 4.71142600  | -1.57575000 | -1.99623800 | C   | 1.07907600  | -0.54534700 | -0.87338300 | C | 2.13405000  | -1.11277100 | -1.64444100 |
| H | 0.44167100  | -2.02899900 | -2.32051900 | H   | 3.60381700  | 2.31462800  | 0.65763300  | C | 2.55450000  | 0.01727000  | -0.89618000 |
| C | -2.39163300 | -0.89580600 | -1.10200400 | Cl  | -0.44884100 | 1.91929200  | -1.82881700 | C | 2.58424700  | 0.02144100  | 0.53256400  |
| C | -1.61317400 | -1.79025700 | -0.32195400 | Ru  | -0.73996300 | 0.15148300  | -0.16578900 | C | 2.15810600  | -1.18526600 | 1.17095000  |
| C | -1.33561100 | -1.54937000 | 1.05966100  |     |             |             |             | C | 1.81259600  | -2.36181300 | 0.44871200  |
| C | -1.85818800 | -0.33102400 | 1.59069200  |     |             |             |             | C | 1.73031500  | -2.30639200 | -0.96586200 |
| C | -2.73182900 | 0.52729500  | 0.85473400  | TS1 |             |             |             | H | 2.04776200  | -1.04910500 | -2.73110500 |
| C | -2.97716000 | 0.27187100  | -0.50780000 |     |             |             |             | H | 2.76971300  | 0.94227200  | -1.43509000 |
| H | -2.51600900 | -1.07532400 | -2.17186200 | N   | -0.73518300 | -0.18113500 | 1.40364800  | H | 2.06583100  | -1.19730200 | 2.26085000  |
| H | -1.14862100 | -2.64319100 | -0.82113100 | C   | -1.68037900 | 0.67779400  | 1.03646100  | H | 1.47878700  | -3.25407900 | 0.98355200  |
| H | -1.58857200 | -0.04473200 | 2.61152900  | C   | -1.32943900 | 1.63164900  | -0.00221200 | C | 1.18491900  | -3.45443600 | -1.74922600 |
| H | -3.10892400 | 1.44420700  | 1.31226900  | C   | -2.09075700 | 2.76417600  | -0.31095100 | H | 2.00197200  | -4.05744600 | -2.17315600 |
| C | -3.74294700 | 1.22669000  | -1.35693100 | H   | -2.98801900 | 2.98296800  | 0.27445200  | H | 0.57809500  | -4.12363100 | -1.12452700 |

|     |             |             |             |   |             |             |             |    |             |             |             |
|-----|-------------|-------------|-------------|---|-------------|-------------|-------------|----|-------------|-------------|-------------|
| H   | 0.56848700  | -3.10693000 | -2.58878900 | N | -0.69006000 | -0.85343500 | 0.75409000  | H  | 2.99038600  | 0.83019300  | -2.06222000 |
| C   | 2.99732000  | 1.23080100  | 1.35029200  | C | -1.90417600 | -0.23485500 | 0.86598400  | H  | 2.13024400  | 2.84533500  | -0.87894100 |
| H   | 3.91492400  | 0.92328600  | 1.89033500  | C | -2.02041500 | 1.01113400  | 0.12636300  | C  | 1.41263100  | 3.09125100  | 1.76195700  |
| C   | 3.34822500  | 2.43669700  | 0.49465100  | C | -3.22045300 | 1.72914600  | 0.02478900  | H  | 0.69943600  | 3.62224800  | 1.11425000  |
| H   | 2.47523400  | 2.77821000  | -0.08401900 | H | -4.11319300 | 1.34962100  | 0.53169100  | H  | 0.89175600  | 2.83316700  | 2.69299600  |
| H   | 3.66550400  | 3.27630200  | 1.12786500  | C | -2.22459600 | -2.12248100 | 1.96568000  | H  | 2.21644300  | 3.80080500  | 2.01348000  |
| H   | 4.16754600  | 2.23359700  | -0.20936000 | C | -3.25898400 | 2.91064900  | -0.70455500 | C  | 3.46148100  | -1.69263300 | -1.04828100 |
| C   | 1.95042700  | 1.61373600  | 2.38995100  | C | -0.71537600 | -1.91449900 | 1.75389000  | H  | 3.25640000  | -1.50504300 | -2.11748600 |
| H   | 1.65061700  | 0.77265900  | 3.02966900  | C | -0.89957100 | 2.64394700  | -1.22819800 | C  | 4.97242200  | -1.81969000 | -0.87715000 |
| H   | 2.32986400  | 2.40960900  | 3.04641200  | H | -2.59329800 | -2.99086800 | 1.37793700  | H  | 5.23412200  | -2.00581900 | 0.17607200  |
| H   | 1.03708300  | 1.97908300  | 1.89698300  | H | -0.18066500 | -2.81658900 | 1.41480200  | H  | 5.37535300  | -2.65286200 | -1.47135800 |
| C   | -0.17714200 | 1.27479300  | -0.73473700 | N | -2.86167200 | -0.89075400 | 1.49068700  | H  | 5.49667400  | -0.90424600 | -1.18631900 |
| Ru  | 0.62892600  | -0.55516300 | -0.18258100 | H | -0.21700800 | -1.58323000 | 2.68650400  | C  | 2.74425700  | -2.97746500 | -0.66711000 |
| O   | -1.20511500 | -1.32764800 | -1.11180200 | H | -2.48967500 | -2.34026500 | 3.01179200  | H  | 1.65482000  | -2.86535200 | -0.77223700 |
| H   | -3.43493700 | 0.02627600  | 0.44101400  | C | -2.09159800 | 3.36077800  | -1.33260900 | H  | 3.06785300  | -3.81298400 | -1.30403700 |
| H   | -1.25404000 | -2.27505600 | -0.94531900 | H | -2.11548900 | 4.28696800  | -1.91556500 | H  | 2.95238900  | -3.27338300 | 0.37282300  |
| C   | -4.41527000 | -1.62821800 | -0.77009200 | H | -4.18666800 | 3.48185200  | -0.78752800 | C  | -0.81294600 | 1.45322500  | -0.48257600 |
| H   | -5.41818800 | -1.31822400 | -0.42645700 | H | -0.01292900 | 3.02456000  | -1.74716700 | Ru | 0.87509700  | 0.31373000  | -0.11444600 |
| H   | -4.13873600 | -2.52328000 | -0.16800900 | C | 2.09347000  | 0.64282400  | 1.74135400  | H  | 0.40029900  | -0.34205900 | -1.54478200 |
| H   | -4.53437600 | -1.97489500 | -1.81350000 | C | 2.57569800  | -0.52197000 | 1.05366000  | H  | -1.14443300 | -1.54384200 | -0.63823600 |
| O   | -3.50463700 | -0.58839000 | -0.67951700 | C | 2.94846500  | -0.48097000 | -0.30556100 | O  | -1.67077900 | -1.84324400 | -1.49797800 |
| H   | -2.28127700 | -0.94487800 | -0.93028500 | C | 2.77594000  | 0.77223500  | -0.99181200 | H  | -1.38362800 | -1.15299600 | -2.12098000 |
|     |             |             |             | C | 2.28648400  | 1.91951900  | -0.31807700 | H  | -2.77081300 | -1.71381500 | -1.23206100 |
|     |             |             |             | C | 1.95368200  | 1.87947200  | 1.08032800  | C  | -4.87147900 | -2.64957100 | -0.80846100 |
| TSa |             |             |             | H | 1.77151000  | 0.55404700  | 2.78245000  | H  | -5.07406500 | -2.89199800 | -1.85942800 |
|     |             |             |             | H | 2.60785900  | -1.47251100 | 1.59326600  | H  | -4.46727300 | -3.54834300 | -0.31428100 |

|                            |             |             |             |    |             |             |             |     |             |             |             |
|----------------------------|-------------|-------------|-------------|----|-------------|-------------|-------------|-----|-------------|-------------|-------------|
| H                          | -5.82578200 | -2.38958800 | -0.33043600 | C  | 2.27552200  | 0.83130000  | -1.21211200 | C   | -0.45486000 | -1.77501500 | -2.57415800 |
| O                          | -3.98471700 | -1.55414300 | -0.75651900 | C  | 2.34418200  | 1.19504200  | 0.16802200  | H   | 0.54311500  | -2.21821200 | -2.69047900 |
| H                          | -3.79840500 | -1.23900600 | 0.21546600  | C  | 2.61754200  | 0.07769400  | 1.02447600  | H   | -1.18242200 | -2.44229600 | -3.06929500 |
|                            |             |             |             | C  | 3.46528300  | -1.02040500 | 0.56791600  | N   | -0.74119500 | -1.62686200 | -1.16301000 |
|                            |             |             |             | C  | 3.40156200  | -1.35587400 | -0.74549500 | C   | -2.08645100 | -1.43467000 | -0.82991800 |
| $\gamma$ -TS5 <sub>d</sub> |             |             |             | H  | 2.35822100  | -0.81250000 | -2.61176000 | C   | -3.01211600 | -0.84813700 | -1.71292200 |
|                            |             |             |             | H  | 1.98947400  | 1.57051700  | -1.96440800 | C   | -2.55100100 | -1.82367000 | 0.44224400  |
| N                          | -0.41789900 | -0.03481200 | 1.57908900  | H  | 2.53459200  | 0.24939500  | 2.10422500  | C   | -4.32950600 | -0.62214200 | -1.32183900 |
| C                          | -1.34949800 | 0.87571200  | 1.48924800  | H  | 4.04689500  | -1.60159400 | 1.28785000  | H   | -2.68878600 | -0.53571400 | -2.70806800 |
| C                          | -1.47180100 | 1.57247300  | 0.23408200  | C  | 4.07507700  | -2.53134800 | -1.35242700 | C   | -3.86839000 | -1.59850800 | 0.82491700  |
| C                          | -2.49125700 | 2.48397800  | -0.07107200 | H  | 4.71827500  | -3.05559300 | -0.63405200 | H   | -1.84940700 | -2.31084700 | 1.12609800  |
| H                          | -3.21919900 | 2.77473900  | 0.69323000  | H  | 3.32178200  | -3.25080800 | -1.71306800 | C   | -4.76962900 | -0.98603500 | -0.04993500 |
| C                          | -1.76433500 | -0.07111800 | 3.51322500  | H  | 4.68738300  | -2.25530300 | -2.22564800 | H   | -5.02140800 | -0.15027800 | -2.02480600 |
| C                          | -2.58914300 | 3.00340400  | -1.35551100 | C  | 2.18465700  | 2.59100600  | 0.73309600  | H   | -4.20417600 | -1.92623800 | 1.81383500  |
| C                          | -0.43004900 | -0.56243900 | 2.93448800  | H  | 1.37490800  | 2.53677400  | 1.48699200  | H   | -5.80620900 | -0.81533000 | 0.24962100  |
| C                          | -0.64533800 | 1.69953900  | -2.01428300 | C  | 3.46724000  | 3.00039700  | 1.45618300  | H   | -0.46158800 | -0.81883400 | -3.12869600 |
| H                          | -2.54131400 | -0.85439700 | 3.45183600  | H  | 4.31554800  | 3.04503000  | 0.75576100  | C   | 0.97787300  | -3.34345400 | 1.36376700  |
| H                          | -0.33474900 | -1.65702200 | 2.94574500  | H  | 3.36340100  | 3.99586000  | 1.91148500  | H   | 1.30612600  | -4.38786000 | 1.18314900  |
| N                          | -2.08132500 | 1.05070100  | 2.63441400  | H  | 3.74012400  | 2.29536200  | 2.25343600  | H   | 1.67424700  | -2.93111800 | 2.12421200  |
| H                          | 0.43355600  | -0.16517500 | 3.49969600  | C  | 1.80874500  | 3.64418500  | -0.29466100 | H   | -0.01711500 | -3.42345100 | 1.85912700  |
| H                          | -1.69068500 | 0.24199100  | 4.56433200  | H  | 0.85760500  | 3.42831400  | -0.79678400 | O   | 0.97578100  | -2.59110100 | 0.21347400  |
| C                          | -1.67264900 | 2.59052200  | -2.32762600 | H  | 1.71177600  | 4.62972500  | 0.18258700  | H   | -0.04483300 | -2.38865400 | -0.44153500 |
| H                          | -1.75587400 | 2.97865700  | -3.34714200 | H  | 2.58596000  | 3.73954000  | -1.06954200 |     |             |             |             |
| H                          | -3.38101100 | 3.71192900  | -1.60710600 | C  | -0.49177500 | 1.18082000  | -0.71846700 |     |             |             |             |
| H                          | 0.05252000  | 1.41212400  | -2.80771000 | Ru | 0.81109200  | -0.28105100 | -0.13428200 | TSc |             |             |             |
| C                          | 2.49734300  | -0.53390100 | -1.56146800 | H  | -3.05145700 | 1.32701400  | 2.53542100  |     |             |             |             |



|   |             |             |             |    |             |             |             |     |             |             |             |  |
|---|-------------|-------------|-------------|----|-------------|-------------|-------------|-----|-------------|-------------|-------------|--|
| N | 0.64302500  | 1.12251100  | 0.76774400  | H  | -2.34802400 | -1.47296300 | -2.07541800 |     |             |             |             |  |
| C | 2.00953700  | 1.05762000  | 0.75314000  | H  | -0.87863300 | -3.21081500 | -1.06730900 |     |             |             |             |  |
| C | 2.53062300  | -0.10953500 | 0.06527000  | C  | -0.03407800 | -3.41282900 | 1.54063300  | TSb |             |             |             |  |
| C | 3.90334000  | -0.35053800 | -0.08012800 | H  | 0.79577200  | -3.63599100 | 0.85442000  |     |             |             |             |  |
| H | 4.61252900  | 0.35761600  | 0.35900600  | H  | 0.39936400  | -3.07970000 | 2.49207400  | N   | 1.26493500  | 2.29700300  | -1.07879600 |  |
| C | 1.65329100  | 2.99006000  | 1.77245000  | H  | -0.56918500 | -4.35708300 | 1.72642700  | C   | 1.85125500  | 1.51411300  | -0.09021300 |  |
| C | 4.33455300  | -1.47676500 | -0.76932900 | C  | -3.59258500 | 0.66123500  | -0.84152200 | C   | 2.45848700  | 0.20861800  | -0.46192700 |  |
| C | 0.29202000  | 2.26309700  | 1.60114200  | H  | -3.43784800 | 0.58873400  | -1.93302000 | C   | 3.84080300  | 0.01887700  | -0.52118000 |  |
| C | 2.01752700  | -2.09480100 | -1.17714700 | C  | -5.04835600 | 0.30804700  | -0.55099700 | H   | 4.51095700  | 0.85138100  | -0.28805200 |  |
| H | 1.65272300  | 4.01307900  | 1.34824000  | H  | -5.25894800 | 0.36919700  | 0.52803700  | C   | 1.10973900  | 3.27794300  | 0.99350500  |  |
| H | -0.49814000 | 2.87982200  | 1.13276800  | H  | -5.74027100 | 0.99243800  | -1.06347800 | C   | 4.35027600  | -1.22824800 | -0.88320100 |  |
| N | 2.66028100  | 2.15008300  | 1.11425000  | H  | -5.28997600 | -0.71498900 | -0.87203200 | C   | 0.46623700  | 3.30660500  | -0.40258900 |  |
| H | -0.12775900 | 1.93181500  | 2.56870300  | C  | -3.27641500 | 2.09150800  | -0.43360600 | C   | 2.09047600  | -2.09005800 | -1.07336400 |  |
| H | 1.90680100  | 3.13234400  | 2.83629900  | H  | -2.22560400 | 2.33622500  | -0.64922000 | H   | 1.85201200  | 4.08937800  | 1.10605900  |  |
| C | 3.38284600  | -2.34541700 | -1.31684700 | H  | -3.91650700 | 2.80622300  | -0.97107000 | H   | 0.53247000  | 4.28733700  | -0.89583500 |  |
| H | 3.71458100  | -3.23101900 | -1.86810700 | H  | -3.44293400 | 2.26226600  | 0.64127600  | N   | 1.79337700  | 1.99367600  | 1.10861300  |  |
| H | 5.40138500  | -1.68216500 | -0.88591700 | C  | 1.53755800  | -0.97723800 | -0.47020000 | H   | -0.60497600 | 3.01866800  | -0.37484400 |  |
| H | 1.30887500  | -2.78961000 | -1.64132900 | Ru | -0.44151000 | -0.46892700 | -0.09649300 | H   | 0.38299500  | 3.42001800  | 1.80851100  |  |
| C | -1.44730900 | -1.31263200 | 1.73071500  | H  | -0.18381800 | 0.36723200  | -1.49058300 | C   | 3.47238900  | -2.27508700 | -1.16760800 |  |
| C | -2.28153100 | -0.30763000 | 1.13956600  | H  | 0.82295400  | 1.79701300  | -0.69195600 | H   | 3.87000900  | -3.25162200 | -1.45901200 |  |
| C | -2.67132900 | -0.36033800 | -0.21595300 | O  | 1.42454500  | 2.48977200  | -1.27190800 | H   | 5.43000100  | -1.38161400 | -0.94539800 |  |
| C | -2.12966400 | -1.43397600 | -1.00489500 | H  | 2.17137400  | 2.62747800  | -0.57952900 | H   | 1.42253400  | -2.93200000 | -1.28622800 |  |
| C | -1.29359200 | -2.42394600 | -0.43185400 | C  | 0.73758400  | 3.66935300  | -1.69385800 | C   | -1.08373600 | 0.15153600  | 1.89635500  |  |
| C | -0.94465700 | -2.38272000 | 0.96124800  | H  | 0.31208700  | 4.21497800  | -0.84126800 | C   | -2.15322600 | 0.43212200  | 0.98820200  |  |
| H | -1.13921600 | -1.21108800 | 2.77452900  | H  | 1.44502300  | 4.30641900  | -2.23446000 | C   | -2.49203800 | -0.49072600 | -0.02209500 |  |
| H | -2.59534300 | 0.54041400  | 1.75583500  | H  | -0.06048900 | 3.35325800  | -2.37286800 | C   | -1.74183000 | -1.72008200 | -0.07370600 |  |

|    |             |             |             |                            |             |             |             |    |             |             |             |
|----|-------------|-------------|-------------|----------------------------|-------------|-------------|-------------|----|-------------|-------------|-------------|
| C  | -0.72429000 | -2.00421100 | 0.89395100  | $\alpha$ -TS2 <sub>a</sub> |             |             |             | H  | -0.09703600 | -1.03860400 | -2.74690300 |
| C  | -0.40216400 | -1.08880300 | 1.94065900  |                            |             |             |             | H  | 1.88147300  | 0.33610600  | -2.15659600 |
| H  | -0.74748900 | 0.94854800  | 2.56661300  | N                          | -0.18613800 | 1.65901800  | 0.05322800  | H  | 2.41642100  | -1.92879800 | 1.47406300  |
| H  | -2.62580700 | 1.41618300  | 1.01451200  | C                          | -1.49541600 | 1.94642900  | -0.40799000 | H  | 0.42790100  | -3.32456000 | 0.90898800  |
| H  | -1.93953400 | -2.43647200 | -0.87603600 | C                          | -2.44607500 | 0.87299900  | -0.15443700 | C  | -1.09997300 | -3.19753100 | -1.40005400 |
| H  | -0.13703500 | -2.92198200 | 0.78875900  | C                          | -3.83336200 | 1.05664400  | -0.19129400 | H  | -1.91405100 | -2.59828400 | -1.82765400 |
| C  | 0.71343300  | -1.34566900 | 2.89761800  | H                          | -4.22888500 | 2.03156200  | -0.48958900 | H  | -0.78097700 | -3.91945700 | -2.16760400 |
| H  | 1.46852200  | -2.00952200 | 2.45483300  | C                          | -0.41488100 | 3.79165800  | -0.90304100 | H  | -1.50306700 | -3.77156300 | -0.55794500 |
| H  | 1.21759400  | -0.40961100 | 3.17214800  | C                          | -4.67327500 | 0.00923600  | 0.16971000  | C  | 3.76251300  | -0.10353000 | -0.10502400 |
| H  | 0.35668400  | -1.82191700 | 3.82416200  | C                          | 0.63526700  | 2.74535900  | -0.48186600 | H  | 4.51599500  | -0.91312800 | -0.05235300 |
| C  | -3.56696600 | -0.23528200 | -1.05124100 | C                          | -2.73444100 | -1.38891900 | 0.59594700  | C  | 4.19373600  | 0.83485100  | -1.21985600 |
| H  | -3.24069300 | -0.76143000 | -1.96590300 | H                          | -0.48536100 | 4.62045800  | -0.17480700 | H  | 3.51634900  | 1.69822500  | -1.30896100 |
| C  | -4.87974400 | -0.86351500 | -0.59048300 | H                          | 1.35559700  | 3.11238800  | 0.26543600  | H  | 5.19639500  | 1.23613300  | -1.01884500 |
| H  | -5.24858300 | -0.37947700 | 0.32670700  | N                          | -1.68647100 | 3.09038200  | -0.95431100 | H  | 4.23029900  | 0.33479300  | -2.19797000 |
| H  | -5.66001900 | -0.75868000 | -1.35751900 | H                          | 1.22231700  | 2.39672400  | -1.35117200 | C  | 3.77935100  | 0.61593900  | 1.23516300  |
| H  | -4.76761800 | -1.93519200 | -0.37334300 | H                          | -0.18507300 | 4.26419200  | -1.87085800 | H  | 3.51871800  | -0.04615900 | 2.07164400  |
| C  | -3.73951300 | 1.23207800  | -1.40122000 | C                          | -4.11881000 | -1.20542800 | 0.58388800  | H  | 4.77255700  | 1.03733800  | 1.44645900  |
| H  | -2.78276100 | 1.68766700  | -1.69496100 | H                          | -4.77480300 | -2.01959900 | 0.90628400  | H  | 3.05436800  | 1.44439800  | 1.23325500  |
| H  | -4.44086300 | 1.35190400  | -2.23829500 | H                          | -5.75782700 | 0.14023900  | 0.15208900  | C  | -1.86816100 | -0.36456600 | 0.19939800  |
| H  | -4.14945000 | 1.81208800  | -0.56028600 | H                          | -2.33254900 | -2.34749200 | 0.93837700  | Ru | 0.21358700  | -0.46065800 | 0.10650000  |
| C  | 1.55757800  | -0.84864500 | -0.70971100 | C                          | 0.48570400  | -1.28692200 | -1.85733500 | C  | 0.84590500  | 0.42918500  | 3.11505200  |
| Ru | -0.30414500 | -0.21627900 | -0.14210900 | C                          | 1.62850500  | -0.51034300 | -1.51259600 | H  | 1.33008300  | -0.55233100 | 3.27240400  |
| H  | -0.40174600 | 0.05120200  | -1.75948200 | C                          | 2.44523500  | -0.80195800 | -0.38158700 | H  | 0.35193900  | 0.69212500  | 4.06819100  |
| H  | 0.91400800  | 1.83727800  | -1.91355800 | C                          | 1.92085700  | -1.77319200 | 0.50975000  | H  | 1.65502500  | 1.16874200  | 2.95541900  |
|    |             |             |             | C                          | 0.77705900  | -2.56973400 | 0.20134700  | O  | -0.08211000 | 0.39159600  | 2.08391100  |
|    |             |             |             | C                          | 0.06600700  | -2.35261000 | -1.01005300 | H  | -0.15293600 | 1.35152500  | 1.26823500  |

|     |             |             |             |    |             |             |             |                            |             |             |             |
|-----|-------------|-------------|-------------|----|-------------|-------------|-------------|----------------------------|-------------|-------------|-------------|
|     |             |             |             | C  | 2.33518200  | 1.91261900  | -0.21249100 | C                          | -5.09355700 | -2.46675600 | -0.33713000 |
|     |             |             |             | C  | 1.99791900  | 1.83075300  | 1.18338700  | H                          | -4.76009900 | -3.37355600 | 0.19558000  |
| TSd |             |             |             | H  | 1.82327900  | 0.45427600  | 2.84404400  | H                          | -6.00705100 | -2.09853500 | 0.15374600  |
|     |             |             |             | H  | 2.72901400  | -1.51701200 | 1.61509900  | H                          | -5.35952300 | -2.75238400 | -1.36373900 |
| N   | -0.61554100 | -0.87954900 | 0.78697600  | H  | 3.08591500  | 0.88970900  | -1.97829200 | O                          | -4.10947500 | -1.46497900 | -0.38324900 |
| C   | -1.78372400 | -0.22207100 | 1.02462000  | H  | 2.15440600  | 2.84761000  | -0.75066000 | H                          | -3.82278100 | -1.15600500 | 0.55202700  |
| C   | -1.90416300 | 1.03892300  | 0.30254900  | C  | 1.42232800  | 3.01051000  | 1.89266600  | C                          | -1.99466200 | -0.64533300 | -2.63649900 |
| C   | -3.08945000 | 1.78347600  | 0.24888300  | H  | 0.70316700  | 3.54291900  | 1.25266100  | H                          | -2.47600700 | -1.18141000 | -3.46164100 |
| H   | -3.95940100 | 1.44175900  | 0.81852200  | H  | 0.89785600  | 2.71415500  | 2.81032900  | H                          | -2.58229000 | 0.23544200  | -2.34733700 |
| C   | -2.09831300 | -2.12658500 | 2.08954300  | H  | 2.20643800  | 3.73114300  | 2.17327200  | H                          | -0.98045300 | -0.33951000 | -2.90981700 |
| C   | -3.14590000 | 2.93792500  | -0.52492200 | C  | 3.63318900  | -1.62741100 | -1.03263400 |                            |             |             |             |
| C   | -0.61257900 | -2.00903000 | 1.70464600  | H  | 3.27289000  | -1.50479100 | -2.06996900 |                            |             |             |             |
| C   | -0.82768100 | 2.59555100  | -1.17459200 | C  | 5.15701200  | -1.54160900 | -1.05464600 | $\gamma$ -TS5 <sub>a</sub> |             |             |             |
| H   | -2.59124800 | -2.94926200 | 1.52807700  | H  | 5.57182300  | -1.65619400 | -0.04122400 |                            |             |             |             |
| H   | -0.19555300 | -2.91915900 | 1.24301700  | H  | 5.59434400  | -2.33090900 | -1.68342800 | N                          | -1.23770100 | 1.51822400  | -0.33288500 |
| N   | -2.70753400 | -0.84411600 | 1.72821700  | H  | 5.50633900  | -0.57403000 | -1.44249700 | C                          | -0.39647600 | 2.40575000  | 0.14514800  |
| H   | 0.02055600  | -1.78921200 | 2.58764100  | C  | 3.16040100  | -2.98406800 | -0.54016500 | C                          | 0.44533900  | 2.00875700  | 1.25220800  |
| H   | -2.25145600 | -2.36476100 | 3.15400500  | H  | 2.06310200  | -3.02740500 | -0.48227200 | C                          | 1.24801200  | 2.89382500  | 1.97996000  |
| C   | -2.00981800 | 3.33499700  | -1.23983100 | H  | 3.49789000  | -3.78428700 | -1.21379800 | H                          | 1.27255300  | 3.95305200  | 1.71020100  |
| H   | -2.04941900 | 4.23755300  | -1.85808000 | H  | 3.56111900  | -3.22072500 | 0.45754400  | C                          | -1.13080900 | 3.40073500  | -1.73234900 |
| H   | -4.06411500 | 3.52814900  | -0.57470900 | C  | -0.72514200 | 1.42910100  | -0.39362400 | C                          | 2.00555100  | 2.41029600  | 3.04084600  |
| H   | 0.03563600  | 2.93613500  | -1.75757900 | Ru | 0.95750300  | 0.27160300  | -0.06112800 | C                          | -1.96453700 | 2.15001100  | -1.42603800 |
| C   | 2.15529900  | 0.57898400  | 1.80953400  | H  | 0.51017500  | -0.43348200 | -1.47233700 | C                          | 1.16266600  | 0.17179200  | 2.61476400  |
| C   | 2.67601900  | -0.55556100 | 1.09816500  | H  | -1.19083200 | -1.27338300 | -0.81791600 | H                          | -0.42413000 | 3.22249600  | -2.56012300 |
| C   | 3.06164000  | -0.46586000 | -0.25430100 | O  | -1.89176900 | -1.56240600 | -1.52700800 | H                          | -2.08040800 | 1.47380000  | -2.28832100 |
| C   | 2.85838800  | 0.79765200  | -0.91282300 | H  | -2.83669700 | -1.61587500 | -1.03693800 | N                          | -0.35584600 | 3.60144100  | -0.50292900 |

|   |             |             |             |    |             |             |             |                            |             |             |             |
|---|-------------|-------------|-------------|----|-------------|-------------|-------------|----------------------------|-------------|-------------|-------------|
| H | -2.98865500 | 2.41173100  | -1.09905000 | C  | -4.44110600 | 0.68401000  | 0.63327500  | H                          | 3.85454200  | 2.46874100  | -1.28922800 |
| H | -1.74864800 | 4.27557600  | -1.97811700 | H  | -3.58516200 | 1.32189500  | 0.89594800  | O                          | 1.76597900  | 2.39612900  | -1.40809200 |
| C | 1.95097800  | 1.05060300  | 3.36103000  | H  | -5.22777100 | 1.32450400  | 0.21072400  | H                          | 1.28110400  | 1.05486000  | -1.20993000 |
| H | 2.54111200  | 0.66777500  | 4.19879300  | H  | -4.84555000 | 0.26469200  | 1.56703000  |                            |             |             |             |
| H | 2.63483900  | 3.08728900  | 3.62268300  | C  | 0.39099900  | 0.62558300  | 1.53701400  |                            |             |             |             |
| H | 1.18619700  | -0.89122300 | 2.87843300  | Ru | -0.72925000 | -0.48745000 | 0.18589000  | $\alpha$ -TS3 <sub>a</sub> |             |             |             |
| C | -1.16196500 | -1.90685800 | 1.71914300  | H  | 0.64687200  | 3.75010200  | -0.73157300 |                            |             |             |             |
| C | -2.36714800 | -1.22848000 | 1.39657300  | C  | 0.46558100  | -0.16181600 | -2.64753800 | N                          | -0.45974800 | -1.46046400 | 0.94876300  |
| C | -2.81063200 | -1.17214500 | 0.04116400  | H  | 1.27335100  | -0.01003300 | -3.38302700 | C                          | -1.84224700 | -1.01863500 | 0.81928800  |
| C | -2.07921800 | -1.87917600 | -0.95733500 | H  | -0.00325200 | -1.13684300 | -2.85134000 | C                          | -2.13468100 | -0.36331100 | -0.44249400 |
| C | -0.86476000 | -2.51742600 | -0.60644100 | N  | 0.96851600  | -0.04046400 | -1.28311800 | C                          | -3.44396500 | -0.16394100 | -0.90032000 |
| C | -0.38413500 | -2.58594500 | 0.73783500  | C  | 2.13358700  | -0.81309600 | -1.02427600 | H                          | -4.27909500 | -0.52424800 | -0.29336700 |
| H | -0.78669300 | -1.85258500 | 2.74495900  | C  | 3.01132700  | -0.37699000 | -0.01724100 | C                          | -1.79720600 | -1.88449400 | 2.84941300  |
| H | -2.89649500 | -0.67683000 | 2.17433800  | C  | 2.46445300  | -1.96683100 | -1.75128100 | C                          | -3.65491300 | 0.48263500  | -2.11166600 |
| H | -2.39665600 | -1.82965800 | -2.00224300 | C  | 4.14932000  | -1.11081900 | 0.29175500  | C                          | -0.33700100 | -1.78180100 | 2.38384300  |
| H | -0.23116700 | -2.93658200 | -1.39611900 | H  | 2.80092000  | 0.56744800  | 0.48719800  | C                          | -1.25347900 | 0.74491800  | -2.38038000 |
| C | 0.85659600  | -3.32893400 | 1.10197700  | C  | 3.61600400  | -2.69213200 | -1.44026200 | H                          | -2.13902500 | -2.93053200 | 2.94472700  |
| H | 1.54743700  | -3.40921200 | 0.25385800  | H  | 1.83069000  | -2.30396100 | -2.57483400 | H                          | 0.25272600  | -2.69741400 | 2.51881500  |
| H | 1.39650800  | -2.84116200 | 1.92499100  | C  | 4.45623500  | -2.28030200 | -0.40919100 | N                          | -2.58876900 | -1.21294900 | 1.83453900  |
| H | 0.61405900  | -4.35159600 | 1.43080500  | H  | 4.81863800  | -0.75060800 | 1.07761100  | H                          | 0.19234800  | -0.96421600 | 2.89644500  |
| C | -4.05487800 | -0.40838400 | -0.35088600 | H  | 3.85720300  | -3.58770800 | -2.01913300 | H                          | -1.96147900 | -1.42327500 | 3.83549700  |
| H | -3.83487600 | 0.06512200  | -1.32480900 | H  | 5.35587900  | -2.85091100 | -0.16815300 | C                          | -2.55410400 | 0.92551700  | -2.85356900 |
| C | -5.20647600 | -1.38890800 | -0.56299500 | H  | -0.28616600 | 0.61713900  | -2.81825900 | H                          | -2.71533200 | 1.42297800  | -3.81471900 |
| H | -5.44807600 | -1.91890100 | 0.37083200  | C  | 2.99517900  | 2.35360900  | -1.99719000 | H                          | -4.66944900 | 0.63759900  | -2.48578400 |
| H | -6.11457500 | -0.86157500 | -0.88775300 | H  | 3.20687900  | 1.39199200  | -2.53424800 | H                          | -0.41833300 | 1.11643300  | -2.98560700 |
| H | -4.97080800 | -2.14842500 | -1.32136800 | H  | 3.14654800  | 3.14357800  | -2.77069500 | C                          | 2.31616700  | 1.02631100  | -1.24603300 |

|    |             |             |             |                            |             |             |             |    |             |             |             |
|----|-------------|-------------|-------------|----------------------------|-------------|-------------|-------------|----|-------------|-------------|-------------|
| C  | 1.35651700  | 1.89855400  | -0.67031700 | H                          | 0.88714800  | -1.45138100 | -1.24473200 | H  | -2.90496700 | -0.08689600 | 1.43861100  |
| C  | 1.06260700  | 1.90023000  | 0.73177300  | H                          | -0.19397600 | -2.53445600 | -2.40167500 | C  | -0.95329700 | -0.84524700 | 0.86915200  |
| C  | 1.75209800  | 0.92181600  | 1.50004700  | H                          | 1.55718100  | -3.07268600 | -2.04686800 | Ru | -1.14587500 | -0.57258900 | -1.06982900 |
| C  | 2.74897200  | 0.05914400  | 0.95886400  | O                          | 0.13153600  | -3.58356800 | -0.66166200 | C  | -3.20208300 | -1.22098300 | -1.15545000 |
| C  | 3.01155800  | 0.07040500  | -0.43170000 | H                          | -0.36770200 | -2.34402000 | 0.39537400  | H  | -3.54832300 | -1.58538900 | -0.16470400 |
| H  | 2.48142900  | 1.04065600  | -2.32575900 |                            |             |             |             | H  | -3.66154700 | -1.80803400 | -1.98059700 |
| H  | 0.78308700  | 2.54304300  | -1.34041500 |                            |             |             |             | H  | -2.00111200 | -1.97423800 | -1.29907800 |
| H  | 1.50497900  | 0.81474000  | 2.56012400  | $\alpha$ -TS3 <sub>b</sub> |             |             |             | O  | -3.09147300 | 0.07660800  | -1.33551600 |
| H  | 3.23473300  | -0.68019900 | 1.59939700  |                            |             |             |             | C  | -0.45766900 | 2.46715200  | 1.15867100  |
| C  | 3.97677700  | -0.88812100 | -1.04680600 | N                          | 0.70256100  | -1.80763400 | -0.94281500 | C  | 0.88577000  | 2.06290400  | 1.07993500  |
| H  | 4.98763200  | -0.45349900 | -1.08232500 | C                          | 1.26678600  | -1.68266900 | 0.40340300  | C  | 1.42146700  | 1.55597400  | -0.09528100 |
| H  | 4.03712200  | -1.82344500 | -0.47574400 | C                          | 0.28294800  | -1.31609600 | 1.39306300  | C  | 0.54156900  | 1.38745700  | -1.19686000 |
| H  | 3.69267400  | -1.13683200 | -2.07738100 | C                          | 0.52125100  | -1.38239600 | 2.77497300  | C  | -0.79733200 | 1.81836100  | -1.12857100 |
| C  | 0.05667700  | 2.84519000  | 1.36145500  | H                          | 1.49577800  | -1.73422800 | 3.12638600  | C  | -1.31038900 | 2.38996100  | 0.06816900  |
| H  | 0.65319100  | 3.59058100  | 1.92481900  | C                          | 3.02022600  | -2.24249600 | -0.82287900 | H  | -0.83683600 | 2.87358600  | 2.10098200  |
| C  | -0.76980900 | 3.60203500  | 0.33312000  | C                          | -0.47403100 | -1.00422700 | 3.66378500  | H  | 1.52246800  | 2.18287800  | 1.95979400  |
| H  | -1.35031800 | 2.91026100  | -0.29818800 | C                          | 1.89682700  | -1.88008100 | -1.80728100 | H  | 0.96042900  | 1.10410600  | -2.16980000 |
| H  | -1.48535300 | 4.26878400  | 0.83280400  | C                          | -1.94886700 | -0.48134900 | 1.79836800  | H  | -1.39892800 | 1.89300100  | -2.03987700 |
| H  | -0.15329500 | 4.22751500  | -0.32709900 | H                          | 3.27607500  | -3.31783800 | -0.84818700 | C  | -2.72339200 | 2.86272900  | 0.12985900  |
| C  | -0.86358100 | 2.14919200  | 2.35730900  | H                          | 1.74710400  | -2.59961600 | -2.62174300 | H  | -2.94914600 | 3.56930600  | -0.68321000 |
| H  | -0.32075200 | 1.61761400  | 3.15129900  | N                          | 2.52397200  | -1.89315200 | 0.49535800  | H  | -3.41776100 | 2.01963600  | 0.00035300  |
| H  | -1.51459800 | 2.87996600  | 2.85684600  | H                          | 2.05938100  | -0.89377500 | -2.26722200 | H  | -2.94495300 | 3.36071500  | 1.08267500  |
| H  | -1.51840900 | 1.42338600  | 1.85082600  | H                          | 3.95920000  | -1.70837100 | -1.04045200 | C  | 2.90601900  | 1.32575700  | -0.28072600 |
| C  | -1.00445000 | 0.10538500  | -1.15559500 | C                          | -1.70850900 | -0.55870400 | 3.16657800  | H  | 3.02239800  | 0.39464000  | -0.86251400 |
| Ru | 0.82343100  | -0.11796300 | -0.20030700 | H                          | -2.49280200 | -0.25429400 | 3.86645000  | C  | 3.50414200  | 2.45307900  | -1.12342500 |
| C  | 0.52060000  | -2.94512100 | -1.64683400 | H                          | -0.30087000 | -1.05111600 | 4.74107100  | H  | 3.41261600  | 3.41886700  | -0.60338800 |

|                            |             |             |             |   |             |             |             |                            |             |             |             |
|----------------------------|-------------|-------------|-------------|---|-------------|-------------|-------------|----------------------------|-------------|-------------|-------------|
| H                          | 4.57320500  | 2.28052500  | -1.31784800 | H | 1.52873600  | -1.98045500 | -3.84468700 | H                          | -1.37366500 | -2.51841400 | 1.34610500  |
| H                          | 3.00071600  | 2.55841300  | -2.09519600 | H | 2.90606700  | -3.24057000 | -2.19671500 | C                          | 0.24512900  | -0.60865300 | -0.98032400 |
| C                          | 3.67762900  | 1.15824700  | 1.01668000  | H | -0.14859700 | -0.33957000 | -3.09722900 | Ru                         | -1.21008500 | 0.60558900  | -0.13843200 |
| H                          | 3.24529500  | 0.37555200  | 1.65457700  | C | -2.56954000 | 1.17981700  | -1.70348100 | C                          | 1.07757200  | 2.81829900  | 0.01885300  |
| H                          | 4.72050000  | 0.87687600  | 0.81181300  | C | -2.68035600 | -0.21459000 | -1.45726600 | H                          | -0.00232500 | 1.75688600  | -0.49107700 |
| H                          | 3.70907200  | 2.09668200  | 1.59181300  | C | -3.00144400 | -0.74863100 | -0.16813100 | H                          | 1.29252400  | 3.08416400  | -1.03213900 |
| H                          | 0.22320200  | -2.70868800 | -0.96486300 | C | -3.13572200 | 0.21329200  | 0.87191500  | H                          | 0.32680800  | 3.45996600  | 0.49853700  |
|                            |             |             |             | C | -3.06977300 | 1.61853200  | 0.65124000  | H                          | 0.80705300  | 0.99522400  | 1.46686400  |
|                            |             |             |             | C | -2.73772300 | 2.11841300  | -0.63270600 | N                          | 1.93893800  | 2.21916800  | 0.79929000  |
| $\alpha$ -TS4 <sub>a</sub> |             |             |             | H | -2.29708700 | 1.53418600  | -2.70047000 | C                          | 2.99299700  | 1.48575200  | 0.25124100  |
|                            |             |             |             | H | -2.44982900 | -0.89672500 | -2.27881000 | C                          | 3.93238400  | 0.94815300  | 1.15175700  |
| N                          | 0.10700200  | 0.21750300  | 1.56359200  | H | -3.29503800 | -0.13332300 | 1.89656400  | C                          | 3.14609900  | 1.19586700  | -1.11940200 |
| C                          | 0.84600400  | -1.02044100 | 1.33109100  | H | -3.17737100 | 2.30765000  | 1.49194900  | C                          | 4.98833000  | 0.16298800  | 0.70323500  |
| C                          | 1.06149800  | -1.32386700 | -0.07011500 | C | -2.56423900 | 3.58141100  | -0.87641300 | H                          | 3.80247900  | 1.16412900  | 2.21586000  |
| C                          | 2.00125700  | -2.27311900 | -0.49287200 | H | -1.76281200 | 3.77412900  | -1.60227400 | C                          | 4.20285500  | 0.40899700  | -1.56140700 |
| H                          | 2.59712800  | -2.79973500 | 0.25781500  | H | -3.48671200 | 4.02116000  | -1.28600400 | H                          | 2.40501500  | 1.54874000  | -1.84053000 |
| C                          | 0.69826700  | -0.93849300 | 3.53129100  | H | -2.32479800 | 4.12211700  | 0.04824500  | C                          | 5.13248200  | -0.10971900 | -0.65756900 |
| C                          | 2.16793200  | -2.51310200 | -1.85083600 | C | -3.13566100 | -2.23654800 | 0.09619300  | H                          | 5.70326200  | -0.24455700 | 1.42253900  |
| C                          | -0.27762500 | 0.11120700  | 2.98315800  | H | -4.22169300 | -2.43151100 | 0.20471300  | H                          | 4.28994700  | 0.17782200  | -2.62656100 |
| C                          | 0.44379300  | -0.87280400 | -2.34459200 | C | -2.62977900 | -3.09276300 | -1.05528200 | H                          | 5.95541800  | -0.73519200 | -1.01119200 |
| H                          | 1.56225900  | -0.48218800 | 4.04848300  | H | -1.56108200 | -2.90844600 | -1.25079100 |                            |             |             |             |
| H                          | -0.22202000 | 1.09297700  | 3.47124600  | H | -2.74018900 | -4.15917600 | -0.81617400 |                            |             |             |             |
| N                          | 1.16873300  | -1.67964800 | 2.37477600  | H | -3.18073500 | -2.91582800 | -1.98921500 | $\alpha$ -TS5 <sub>b</sub> |             |             |             |
| H                          | -1.31886300 | -0.24044600 | 3.04969800  | C | -2.46425500 | -2.66696400 | 1.39539800  |                            |             |             |             |
| H                          | 0.23015300  | -1.61382600 | 4.26362500  | H | -2.84054900 | -2.12922400 | 2.27710100  | N                          | -0.13742400 | -0.18426200 | 1.49021000  |
| C                          | 1.39198600  | -1.80290800 | -2.77342100 | H | -2.63727600 | -3.73582800 | 1.58259800  | C                          | -0.87720700 | 1.03051900  | 1.22960600  |

|   |             |             |             |    |             |             |             |                            |             |             |             |
|---|-------------|-------------|-------------|----|-------------|-------------|-------------|----------------------------|-------------|-------------|-------------|
| C | -1.07076700 | 1.30425900  | -0.18428100 | C  | 2.57431200  | -3.58076000 | -0.76565300 | C                          | -4.41433200 | -0.65997300 | -1.45687700 |
| C | -2.04984200 | 2.18145500  | -0.66301900 | H  | 1.81880800  | -3.77956100 | -1.53747500 | H                          | -2.64917900 | -1.82142400 | -1.81594100 |
| H | -2.70073800 | 2.69272100  | 0.05108000  | H  | 3.51374300  | -4.04297400 | -1.10574300 | C                          | -5.22930100 | -0.01245000 | -0.52685400 |
| C | -0.76845100 | 1.01231500  | 3.43028200  | H  | 2.26919700  | -4.09646300 | 0.15354300  | H                          | -5.51171800 | 0.42584400  | 1.57226100  |
| C | -2.18710700 | 2.36625300  | -2.03436100 | C  | 3.07919300  | 2.24170000  | 0.12828300  | H                          | -4.65630700 | -0.60630600 | -2.52233400 |
| C | 0.17028800  | -0.09851700 | 2.92861600  | H  | 4.15956500  | 2.44627100  | 0.27142300  | H                          | -6.11388700 | 0.53911700  | -0.85262900 |
| C | -0.35211800 | 0.82372500  | -2.42683200 | C  | 2.60529000  | 3.07526500  | -1.05297300 | H                          | -0.12704700 | -1.88021500 | -0.48585400 |
| H | -1.63743300 | 0.61189000  | 3.98220200  | H  | 1.55072900  | 2.86418300  | -1.29233700 |                            |             |             |             |
| H | 0.00627900  | -1.07520300 | 3.40630500  | H  | 2.68164500  | 4.14563400  | -0.81985400 |                            |             |             |             |
| N | -1.23321400 | 1.71394900  | 2.24831300  | H  | 3.20076400  | 2.90271800  | -1.95987000 | $\alpha$ -TS <sub>5a</sub> |             |             |             |
| H | 1.22909600  | 0.16773700  | 3.07527300  | C  | 2.35829100  | 2.67678600  | 1.39844800  |                            |             |             |             |
| H | -0.27155800 | 1.71073400  | 4.12223500  | H  | 2.71450100  | 2.15834500  | 2.29958100  | N                          | -0.70024800 | 0.50305000  | -1.75004900 |
| C | -1.34223300 | 1.68056600  | -2.91261800 | H  | 2.50777400  | 3.75050600  | 1.57539000  | C                          | -0.67035100 | 1.87837100  | -1.40982500 |
| H | -1.45727300 | 1.81785400  | -3.99184700 | H  | 1.27325400  | 2.50869800  | 1.31564600  | C                          | 0.02840500  | 2.15485900  | -0.16268500 |
| H | -2.95763500 | 3.03512800  | -2.42442400 | C  | -0.19582900 | 0.60934300  | -1.05019600 | C                          | 0.43808800  | 3.44008100  | 0.21294200  |
| H | 0.29669400  | 0.30654200  | -3.14319800 | Ru | 1.24375800  | -0.56327900 | -0.11959600 | H                          | 0.19450800  | 4.28447000  | -0.43801200 |
| C | 2.65185400  | -1.20020900 | -1.64068800 | C  | -0.91562300 | -2.66892400 | -0.04256000 | C                          | -1.80177800 | 1.89194400  | -3.29503300 |
| C | 2.75683100  | 0.19537400  | -1.42372800 | H  | -1.30139800 | -3.09536500 | -0.98617900 | C                          | 1.15139500  | 3.61424100  | 1.39342600  |
| C | 2.97807200  | 0.74886300  | -0.12109900 | H  | -0.26780400 | -3.41008100 | 0.45258700  | C                          | -1.61829600 | 0.41486400  | -2.88663300 |
| C | 3.10392900  | -0.19680400 | 0.94618900  | H  | -0.90052400 | -1.02837000 | 1.35287100  | C                          | 1.02427800  | 1.22668600  | 1.81892900  |
| C | 3.05586700  | -1.59925100 | 0.74361500  | N  | -1.80485300 | -2.07302600 | 0.82126100  | H                          | -1.26816200 | 2.13390600  | -4.23205100 |
| C | 2.76186100  | -2.11591400 | -0.54481700 | C  | -2.92226000 | -1.43756900 | 0.31156300  | H                          | -1.20070300 | -0.21916800 | -3.68344700 |
| H | 2.40986000  | -1.57636600 | -2.63752100 | C  | -3.76314700 | -0.77615000 | 1.23813900  | N                          | -1.25841100 | 2.69022200  | -2.20886500 |
| H | 2.56088100  | 0.86418900  | -2.26435000 | C  | -3.28109100 | -1.35891100 | -1.05425000 | H                          | -2.57287300 | -0.04713200 | -2.57793700 |
| H | 3.20947000  | 0.17230100  | 1.96960500  | C  | -4.88909900 | -0.07703100 | 0.82732200  | H                          | -2.85611900 | 2.15427800  | -3.47870400 |
| H | 3.12269500  | -2.27559600 | 1.59861400  | H  | -3.49366300 | -0.82860400 | 2.29715100  | C                          | 1.45514100  | 2.50210400  | 2.18625500  |

|   |             |             |             |                            |             |             |             |   |             |             |             |
|---|-------------|-------------|-------------|----------------------------|-------------|-------------|-------------|---|-------------|-------------|-------------|
| H | 2.03601300  | 2.63340000  | 3.10399000  | H                          | -2.70413300 | 1.95886200  | 0.15003900  | C | -1.56484400 | 1.09675100  | -0.23935800 |
| H | 1.48269000  | 4.61065800  | 1.69555900  | C                          | 0.29140000  | 1.02341200  | 0.64154000  | C | -2.59101900 | 1.94190900  | -0.68053200 |
| H | 1.28936900  | 0.37428300  | 2.45514200  | Ru                         | -0.51555000 | -0.77840500 | -0.00135100 | H | -3.43131100 | 2.17649700  | -0.01977300 |
| C | -0.38086200 | -2.20143900 | 1.64296400  | C                          | 1.40123800  | -2.13585600 | -2.04539800 | C | -2.06842400 | -0.49598800 | 3.02571300  |
| C | -1.20597000 | -1.10100900 | 1.99492300  | H                          | 1.81242600  | -3.00037800 | -1.49411500 | C | -2.52948700 | 2.48027400  | -1.95995900 |
| C | -2.33988700 | -0.71447100 | 1.21802700  | H                          | 2.05603000  | -1.99413500 | -2.92557000 | C | -0.58431600 | -0.72612000 | 2.70911800  |
| C | -2.55617500 | -1.47295400 | 0.02788800  | H                          | 0.40426800  | -2.42659800 | -2.41419000 | C | -0.43146800 | 1.31234600  | -2.34339100 |
| C | -1.80723800 | -2.63923100 | -0.29617500 | H                          | 0.38465400  | 0.02607300  | -1.84491200 | H | -2.66455700 | -1.41018300 | 2.84704100  |
| C | -0.69193400 | -2.99417500 | 0.49330000  | N                          | 1.29705800  | -0.91837400 | -1.26962100 | H | -0.28474100 | -1.78403800 | 2.77685300  |
| H | 0.49889100  | -2.43830600 | 2.24646900  | C                          | 4.14836400  | 1.26140300  | -0.29028800 | N | -2.43690400 | 0.54447500  | 2.06830400  |
| H | -0.90640900 | -0.48553200 | 2.84644400  | C                          | 2.99036400  | 0.80298000  | -0.91250400 | H | 0.07701500  | -0.16593800 | 3.39818700  |
| H | -3.34863500 | -1.16049500 | -0.65839900 | C                          | 2.51679000  | -0.49921000 | -0.68865100 | H | -2.24660000 | -0.18216400 | 4.06389300  |
| H | -2.03577000 | -3.20354300 | -1.20367200 | C                          | 3.26735700  | -1.33827600 | 0.15226900  | C | -1.44598700 | 2.16109000  | -2.78640000 |
| C | 0.12708600  | -4.19990000 | 0.17494200  | C                          | 4.43022800  | -0.88205500 | 0.76664400  | H | -1.39548300 | 2.58306200  | -3.79471700 |
| H | 1.18631100  | -4.05723000 | 0.42673500  | C                          | 4.87519000  | 0.42365700  | 0.55461000  | H | -3.31841200 | 3.14580600  | -2.31764600 |
| H | -0.22910100 | -5.05222500 | 0.77437000  | H                          | 4.48393900  | 2.28655100  | -0.46787900 | H | 0.39187700  | 1.07776000  | -3.02703500 |
| H | 0.05478900  | -4.48909500 | -0.88053100 | H                          | 2.42152900  | 1.46318400  | -1.57237800 | C | 2.47115400  | -0.66732900 | -1.70860700 |
| C | -3.26097000 | 0.42942900  | 1.59716700  | H                          | 2.91254600  | -2.35542200 | 0.34558500  | C | 2.62467200  | 0.54310600  | -0.97160600 |
| H | -4.20983700 | -0.05449800 | 1.90473300  | H                          | 4.99137800  | -1.55015100 | 1.42578400  | C | 2.76202500  | 0.54911200  | 0.44593200  |
| C | -2.75703400 | 1.23871800  | 2.78170300  | H                          | 5.78344400  | 0.78351100  | 1.04344000  | C | 2.70359700  | -0.72074500 | 1.09846600  |
| H | -1.78766600 | 1.71262600  | 2.55877200  |                            |             |             |             | C | 2.56672500  | -1.94043000 | 0.39678400  |
| H | -3.46560800 | 2.04266900  | 3.02323500  |                            |             |             |             | C | 2.38239500  | -1.91469800 | -1.02236200 |
| H | -2.63768400 | 0.63038300  | 3.68918200  | $\gamma$ -TS3 <sub>a</sub> |             |             |             | H | 2.33334200  | -0.63510100 | -2.79173600 |
| C | -3.58026600 | 1.35632400  | 0.43037600  |                            |             |             |             | H | 2.57744200  | 1.49435600  | -1.51060800 |
| H | -3.92203200 | 0.82399000  | -0.46874000 | N                          | -0.44302600 | -0.21609300 | 1.35645100  | H | 2.71311600  | -0.74138900 | 2.19338400  |
| H | -4.38001600 | 2.05764600  | 0.70595400  | C                          | -1.51419200 | 0.48327500  | 1.06713400  | H | 2.49616500  | -2.88454200 | 0.94090200  |



|    |             |             |             |                           |             |             |             |   |             |             |             |
|----|-------------|-------------|-------------|---------------------------|-------------|-------------|-------------|---|-------------|-------------|-------------|
| C  | 2.11688100  | -3.17802700 | -1.77452800 | H                         | -0.29205300 | -1.55078800 | -0.77165400 | H | -3.14974500 | 2.40712000  | 0.96378300  |
| H  | 1.54352300  | -3.89190200 | -1.16771100 | O                         | -2.60010400 | -1.83657900 | -0.39092600 | C | 2.84971300  | 1.74326000  | -1.11726500 |
| H  | 1.55119100  | -2.98509400 | -2.69504800 |                           |             |             |             | H | 3.05266700  | 2.18676800  | -0.11852600 |
| H  | 3.05928100  | -3.67063800 | -2.05935800 |                           |             |             |             | H | 3.17014600  | 2.42945400  | -1.93218700 |
| C  | 2.90906100  | 1.82598200  | 1.24006000  | $\gamma$ -TS <sub>b</sub> |             |             |             | H | 1.48270100  | 2.17675100  | -1.34734900 |
| H  | 2.66619000  | 1.56632500  | 2.28714100  |                           |             |             |             | O | 3.07692100  | 0.46259000  | -1.28876100 |
| C  | 4.35554400  | 2.31090700  | 1.20132100  | N                         | -1.00281600 | 1.23958900  | -0.99031600 | C | 0.96838200  | -2.41369700 | 1.21621700  |
| H  | 4.65050500  | 2.58300900  | 0.17594600  | C                         | -1.48379800 | 1.46178200  | 0.20601300  | C | -0.42368000 | -2.22914600 | 1.14018700  |
| H  | 4.49592000  | 3.20113900  | 1.83121100  | C                         | -0.57240900 | 1.29398200  | 1.30468000  | C | -1.03821200 | -1.83485800 | -0.03774100 |
| H  | 5.05687700  | 1.53948900  | 1.54976700  | C                         | -0.86986300 | 1.45929400  | 2.66454300  | C | -0.20793200 | -1.59828200 | -1.16617300 |
| C  | 1.93993800  | 2.91480200  | 0.80296300  | H                         | -1.88717700 | 1.71721900  | 2.98030000  | C | 1.18480400  | -1.78283800 | -1.09279700 |
| H  | 0.89785300  | 2.56756700  | 0.84690100  | C                         | -3.19992500 | 2.10639600  | -1.15634100 | C | 1.79303100  | -2.20714700 | 0.12166300  |
| H  | 2.03580700  | 3.80307900  | 1.44318400  | C                         | 0.12966700  | 1.28026400  | 3.61280600  | H | 1.41329500  | -2.72211400 | 2.16688200  |
| H  | 2.12999300  | 3.24464200  | -0.22996100 | C                         | -2.04806400 | 1.48302600  | -1.96718900 | H | -1.02390900 | -2.40503800 | 2.03638800  |
| C  | -0.45155200 | 0.75788000  | -1.05468100 | C                         | 1.72442300  | 0.76822200  | 1.84220500  | H | -0.67742700 | -1.41317200 | -2.13864800 |
| Ru | 0.92521300  | -0.52782400 | -0.19781100 | H                         | -3.27285800 | 3.19524400  | -1.32591100 | H | 1.79216500  | -1.77383300 | -2.00361700 |
| H  | -3.41366600 | 0.55407000  | 1.75558200  | H                         | -1.68917200 | 2.13854500  | -2.77638100 | C | 3.27142600  | -2.39130700 | 0.18861000  |
| C  | -1.56521400 | -2.49791700 | -0.46345200 | N                         | -2.81248900 | 1.80861200  | 0.21960400  | H | 3.62754200  | -3.09852500 | -0.57609400 |
| H  | -1.07688100 | -2.93391700 | 0.44335400  | H                         | -2.35026800 | 0.53590300  | -2.45305300 | H | 3.78223500  | -1.43789800 | -0.01338200 |
| H  | -1.27797600 | -3.01851800 | -1.40832700 | H                         | -4.18086000 | 1.67244800  | -1.40269200 | H | 3.59351600  | -2.76413400 | 1.16950200  |
| C  | -5.48694500 | -0.14772700 | -0.42030600 | C                         | 1.42372300  | 0.94033900  | 3.19145500  | C | -2.53999900 | -1.71923100 | -0.18188300 |
| H  | -6.04887100 | -1.03344100 | -0.76839800 | H                         | 2.21096100  | 0.80048900  | 3.93851500  | H | -2.73302800 | -0.82276600 | -0.79866300 |
| H  | -4.91197100 | 0.24101000  | -1.28044500 | H                         | -0.08862700 | 1.40220500  | 4.67580300  | C | -3.09986700 | -2.91688600 | -0.94837200 |
| H  | -6.22500400 | 0.61612800  | -0.13698800 | H                         | 2.73794500  | 0.47808900  | 1.54494800  | H | -2.93830900 | -3.85019500 | -0.38753500 |
| O  | -4.68273000 | -0.42498200 | 0.69022200  | C                         | 0.73366600  | 0.93313400  | 0.85554100  | H | -4.18227100 | -2.81372600 | -1.11723600 |
| H  | -3.96703600 | -1.01894900 | 0.38824600  | Ru                        | 1.01127200  | 0.62064800  | -1.06285400 | H | -2.61964300 | -3.04040400 | -1.92967700 |

|                            |             |             |             |    |             |             |             |                            |             |             |             |
|----------------------------|-------------|-------------|-------------|----|-------------|-------------|-------------|----------------------------|-------------|-------------|-------------|
| C                          | -3.27170600 | -1.52752900 | 1.13589400  | C  | 2.22114400  | -2.14919100 | 0.71846000  | H                          | -1.89150500 | 3.24174000  | -0.69219800 |
| H                          | -2.84759500 | -0.69860600 | 1.72098300  | C  | 2.77394400  | -1.49694200 | -0.42161100 | C                          | -1.49225200 | 0.16995000  | 2.12335100  |
| H                          | -4.33445400 | -1.30556600 | 0.96201000  | C  | 3.43520000  | -0.23845500 | -0.32712600 | H                          | -1.09537000 | 1.10694600  | 2.53491900  |
| H                          | -3.23231200 | -2.43356600 | 1.76016300  | C  | 3.47047500  | 0.36464000  | 0.96600500  | H                          | -1.35959800 | -0.71611400 | 2.76721800  |
|                            |             |             |             | C  | 2.94732500  | -0.26281200 | 2.12248700  | N                          | -2.43210600 | 0.25051500  | 1.22646900  |
|                            |             |             |             | C  | 2.25947500  | -1.50838600 | 1.99307000  | C                          | -4.44948400 | 3.02891900  | 1.05298400  |
| $\gamma$ -TS4 <sub>a</sub> |             |             |             | H  | 1.69221400  | -3.09836000 | 0.60381200  | H                          | -3.97906300 | 3.38406000  | 1.99123800  |
|                            |             |             |             | H  | 2.63915900  | -1.95911300 | -1.40415500 | H                          | -5.19867600 | 2.26551100  | 1.33511200  |
| N                          | 0.66447600  | 1.78923200  | 0.24865600  | H  | 3.88619000  | 1.37390700  | 1.05665100  | H                          | -4.99750800 | 3.87870000  | 0.62141700  |
| C                          | -0.35077100 | 1.93536100  | -0.57012400 | H  | 2.98115400  | 0.24553600  | 3.08821500  | O                          | -3.52953500 | 2.55689400  | 0.11665300  |
| C                          | -0.76600900 | 0.77467300  | -1.31983800 | C  | 1.60508700  | -2.14086500 | 3.17848900  | H                          | -3.09519200 | 1.74733200  | 0.50132700  |
| C                          | -1.79033800 | 0.77350500  | -2.27730500 | H  | 1.25030000  | -1.38588600 | 3.89256000  | C                          | -2.98175400 | -0.91360400 | 0.69315600  |
| H                          | -2.34449100 | 1.69220100  | -2.49157300 | H  | 0.74731000  | -2.75874800 | 2.88198400  | C                          | -2.42639100 | -2.19793300 | 0.86698700  |
| C                          | -0.31751100 | 3.89955600  | 0.55004700  | H  | 2.31151800  | -2.79393600 | 3.71365100  | C                          | -4.13116800 | -0.78663200 | -0.10996700 |
| C                          | -2.10431900 | -0.40792000 | -2.93588100 | C  | 4.02598600  | 0.46119300  | -1.52854700 | C                          | -3.02129700 | -3.30921400 | 0.28044600  |
| C                          | 0.92960400  | 3.06906800  | 0.88123400  | H  | 4.13135800  | 1.52453700  | -1.24390600 | H                          | -1.49195700 | -2.31664100 | 1.42155000  |
| C                          | -0.37683000 | -1.56451300 | -1.67687100 | C  | 5.42129500  | -0.08251600 | -1.82529300 | C                          | -4.72283200 | -1.90384800 | -0.68816900 |
| H                          | -1.04468800 | 3.89133700  | 1.38429400  | H  | 5.37602200  | -1.14475300 | -2.11158600 | H                          | -4.53388100 | 0.21495500  | -0.28139600 |
| H                          | 1.10528900  | 2.95625500  | 1.96298100  | H  | 5.89441300  | 0.46178500  | -2.65534800 | C                          | -4.17478300 | -3.17269900 | -0.49414000 |
| N                          | -0.87125300 | 3.19826800  | -0.60531600 | H  | 6.08540800  | -0.00697600 | -0.95261100 | H                          | -2.57004700 | -4.29600400 | 0.41562800  |
| H                          | 1.84815500  | 3.52003700  | 0.45936700  | C  | 3.12927000  | 0.40310500  | -2.75642100 | H                          | -5.61573100 | -1.78210200 | -1.30659600 |
| H                          | -0.09030200 | 4.95106200  | 0.32389800  | H  | 2.12556600  | 0.79662500  | -2.54151300 | H                          | -4.63647200 | -4.04963700 | -0.95374900 |
| C                          | -1.39019100 | -1.57369000 | -2.63448700 | H  | 3.56044200  | 0.98649900  | -3.58210000 | H                          | -0.08162200 | -0.27761000 | 1.39246300  |
| H                          | -1.64256500 | -2.50775800 | -3.14535000 | H  | 3.00357300  | -0.62569000 | -3.12698500 |                            |             |             |             |
| H                          | -2.90646000 | -0.43004900 | -3.67696000 | C  | -0.03236500 | -0.39467500 | -0.98164800 |                            |             |             |             |
| H                          | 0.13329700  | -2.50752300 | -1.44844700 | Ru | 1.37202600  | -0.16726900 | 0.52201300  | $\gamma$ -TS5 <sub>c</sub> |             |             |             |

|   |             |             |             |    |             |             |             |                            |             |             |             |
|---|-------------|-------------|-------------|----|-------------|-------------|-------------|----------------------------|-------------|-------------|-------------|
|   |             |             |             | H  | -2.67856700 | -1.88055300 | 1.51998300  | H                          | 4.87630000  | 3.82040000  | -0.42480800 |
| N | -0.74776500 | 1.75586200  | -0.19381700 | H  | -3.86767900 | 1.18999900  | -1.32186600 | H                          | 3.81824600  | 3.76285500  | -1.84639900 |
| C | 0.35465200  | 1.92353000  | 0.52342300  | H  | -2.76487700 | -0.07211300 | -3.15985700 | O                          | 3.31317500  | 2.46829500  | -0.27230600 |
| C | 0.80718700  | 0.78405200  | 1.29479000  | C  | -1.30401200 | -2.38688200 | -2.94699200 | H                          | 2.85205700  | 1.35369800  | -0.84379600 |
| C | 1.88162400  | 0.81749300  | 2.18975400  | H  | -0.85376000 | -1.66843100 | -3.64509900 | C                          | 2.95776500  | -0.81860200 | -0.70168000 |
| H | 2.47643000  | 1.72892400  | 2.29163700  | H  | -0.50432100 | -3.01920500 | -2.54107300 | C                          | 2.39999100  | -2.10263300 | -0.90390000 |
| C | 0.22352000  | 3.84767200  | -0.63055600 | H  | -1.96850000 | -3.03689900 | -3.53718500 | C                          | 4.09607900  | -0.70840900 | 0.13388300  |
| C | 2.19618100  | -0.33025500 | 2.90808500  | C  | -4.02258100 | 0.55921600  | 1.34922900  | C                          | 2.96556800  | -3.22039300 | -0.30006100 |
| C | -1.05406000 | 3.01865300  | -0.84651000 | H  | -4.13525300 | 1.58409500  | 0.95071800  | H                          | 1.50052800  | -2.21705800 | -1.51404800 |
| C | 0.38984100  | -1.52555800 | 1.81009500  | C  | -5.41690000 | 0.01598000  | 1.64962900  | C                          | 4.65017300  | -1.83476500 | 0.72218600  |
| H | 0.86051500  | 3.86828700  | -1.53392900 | H  | -5.36333200 | -1.00838800 | 2.04946500  | H                          | 4.50130500  | 0.29219200  | 0.30806400  |
| H | -1.30599200 | 2.87391800  | -1.91020900 | H  | -5.92996500 | 0.63497500  | 2.39898200  | C                          | 4.09233900  | -3.10083300 | 0.51439400  |
| N | 0.92231500  | 3.13836900  | 0.43800400  | H  | -6.04937700 | -0.01501600 | 0.75103000  | H                          | 2.51471600  | -4.20373800 | -0.46348800 |
| H | -1.93720200 | 3.49294700  | -0.37749700 | C  | -3.16411000 | 0.64629500  | 2.60116500  | H                          | 5.52921700  | -1.72654900 | 1.36354000  |
| H | 0.01681400  | 4.89328500  | -0.36013400 | H  | -2.17072900 | 1.06029000  | 2.37764300  | H                          | 4.53409000  | -3.98437500 | 0.98076400  |
| C | 1.44253600  | -1.49433200 | 2.72527400  | H  | -3.64297000 | 1.28660300  | 3.35475600  | H                          | 0.37840700  | -0.11690700 | -1.53816700 |
| H | 1.69809400  | -2.39766000 | 3.28661500  | H  | -3.01233800 | -0.33784000 | 3.06997400  |                            |             |             |             |
| H | 3.03863000  | -0.32812200 | 3.60350200  | C  | 0.04784000  | -0.39100200 | 1.06260700  |                            |             |             |             |
| H | -0.14698300 | -2.46967700 | 1.66345400  | Ru | -1.36883700 | -0.21073200 | -0.43861600 | $\gamma$ -TS4 <sub>b</sub> |             |             |             |
| C | -2.12511400 | -2.24089300 | -0.54966900 | H  | 1.99137900  | 3.08587200  | 0.32767500  |                            |             |             |             |
| C | -2.76110000 | -1.51519200 | 0.49266600  | C  | 1.33577800  | 0.25218200  | -2.08966000 | N                          | 0.13018100  | -0.50618200 | 1.47518300  |
| C | -3.38707100 | -0.25207800 | 0.24459800  | H  | 1.07521200  | 1.23992600  | -2.49742300 | C                          | -0.89683100 | 0.30464100  | 1.51382900  |
| C | -3.43076600 | 0.20780600  | -1.11576900 | H  | 1.42083200  | -0.47866700 | -2.91629800 | C                          | -1.00595100 | 1.28448700  | 0.45939500  |
| C | -2.80314900 | -0.49784900 | -2.15432900 | N  | 2.44005900  | 0.32116300  | -1.25380200 | C                          | -1.98216800 | 2.28669200  | 0.39021300  |
| C | -2.07159200 | -1.69940000 | -1.86611800 | C  | 4.24592400  | 3.13306900  | -1.02813400 | H                          | -2.71917100 | 2.39896300  | 1.19216900  |
| H | -1.56800900 | -3.15240000 | -0.31935400 | H  | 4.95897300  | 2.44223000  | -1.53273900 | C                          | -1.38399900 | -1.20170100 | 3.14442500  |

|   |             |             |             |    |             |             |             |                            |             |             |             |
|---|-------------|-------------|-------------|----|-------------|-------------|-------------|----------------------------|-------------|-------------|-------------|
| C | -2.01434900 | 3.13546800  | -0.70951600 | C  | 3.58747100  | 1.72322900  | 0.98572700  | H                          | -6.14212900 | 1.27402600  | -1.08809200 |
| C | 0.02764200  | -1.43713500 | 2.58476400  | H  | 4.63270500  | 1.60532000  | 1.33412700  | H                          | -0.09101300 | -1.30076500 | -0.81959500 |
| C | -0.11105900 | 1.96202200  | -1.66267000 | C  | 3.50520200  | 3.02420200  | 0.20415400  | H                          | -2.72048400 | 0.28363400  | 2.40892700  |
| H | -2.07740800 | -1.97705700 | 2.77980500  | H  | 2.48289200  | 3.19852600  | -0.16801700 |                            |             |             |             |
| H | 0.18166900  | -2.47403600 | 2.24546500  | H  | 3.76564500  | 3.87628600  | 0.84668300  |                            |             |             |             |
| N | -1.73497300 | 0.09985200  | 2.57456500  | H  | 4.18846000  | 3.04412800  | -0.65667300 | $\gamma$ -TS5 <sub>b</sub> |             |             |             |
| H | 0.81548700  | -1.22582800 | 3.33236300  | C  | 2.69160100  | 1.79879000  | 2.21781400  |                            |             |             |             |
| H | -1.41536400 | -1.18306200 | 4.24342400  | H  | 2.74007100  | 0.89306000  | 2.83804900  | N                          | -0.76797900 | 1.78777100  | -0.18739800 |
| C | -1.07676100 | 2.96591400  | -1.73462900 | H  | 2.97428400  | 2.64738400  | 2.85701600  | C                          | 0.47682300  | 1.92247900  | 0.26262700  |
| H | -1.10416000 | 3.62936000  | -2.60443800 | H  | 1.64137100  | 1.92955300  | 1.91487300  | C                          | 0.97001600  | 0.89263800  | 1.16348500  |
| H | -2.77001200 | 3.92124800  | -0.77744600 | C  | -0.03374200 | 1.09476900  | -0.56099500 | C                          | 2.12000800  | 1.02504300  | 1.94895300  |
| H | 0.59285800  | 1.85127700  | -2.49536200 | Ru | 1.30037400  | -0.45557000 | -0.25887400 | H                          | 2.69090800  | 1.95708600  | 1.92078900  |
| C | 2.57765800  | -0.56699000 | -2.00652400 | C  | -1.22266200 | -2.36274700 | -0.76139800 | C                          | 0.37703000  | 3.57558500  | -1.23809400 |
| C | 2.91249100  | 0.58132100  | -1.23795800 | H  | -0.53238100 | -3.15860800 | -0.44939400 | C                          | 2.53035300  | -0.04608500 | 2.73381500  |
| C | 3.27930300  | 0.50295700  | 0.13906800  | H  | -1.34516300 | -2.28209500 | -1.85936300 | C                          | -0.95978300 | 2.79513900  | -1.22464700 |
| C | 3.23269000  | -0.79873200 | 0.72013000  | N  | -2.16694600 | -2.03644700 | 0.08214200  | C                          | 0.64815800  | -1.36242100 | 1.93946900  |
| C | 2.94999400  | -1.97234100 | -0.03236900 | C  | -3.18052700 | -1.17318900 | -0.30015600 | H                          | 0.83847000  | 3.62860700  | -2.23774000 |
| C | 2.56790800  | -1.86012700 | -1.39578200 | C  | -3.17022800 | -0.36434400 | -1.45778100 | H                          | -1.19466300 | 2.31197000  | -2.19266600 |
| H | 2.27858200  | -0.45468900 | -3.05128700 | C  | -4.29015600 | -1.06166900 | 0.56637200  | N                          | 1.25174100  | 2.85759600  | -0.31070000 |
| H | 2.82650800  | 1.55991500  | -1.71534400 | C  | -4.22380300 | 0.50088800  | -1.72957000 | H                          | -1.82040300 | 3.44549600  | -0.99502400 |
| H | 3.40958800  | -0.90414200 | 1.79496200  | H  | -2.30078800 | -0.37663800 | -2.12083600 | H                          | 0.23740400  | 4.61828400  | -0.90885000 |
| H | 2.92629900  | -2.94569000 | 0.46316100  | C  | -5.34377700 | -0.19884800 | 0.28416300  | C                          | 1.78694600  | -1.23190900 | 2.73440000  |
| C | 2.16311900  | -3.06261100 | -2.18383900 | H  | -4.30288100 | -1.69416100 | 1.45936200  | H                          | 2.11397600  | -2.07193000 | 3.35396900  |
| H | 1.80074600  | -3.87120600 | -1.53601600 | C  | -5.31956200 | 0.58964600  | -0.86801300 | H                          | 3.43572000  | 0.03223100  | 3.33975300  |
| H | 1.37138100  | -2.82154500 | -2.90539400 | H  | -4.18046200 | 1.13295200  | -2.62114100 | H                          | 0.10894300  | -2.31640300 | 1.94333100  |
| H | 3.01691500  | -3.45729500 | -2.75589000 | H  | -6.19538400 | -0.14185100 | 0.96799800  | C                          | -1.91306800 | -2.33488700 | -0.26112800 |

|    |             |             |             |     |             |             |             |   |             |             |             |
|----|-------------|-------------|-------------|-----|-------------|-------------|-------------|---|-------------|-------------|-------------|
| C  | -2.60006800 | -1.52967700 | 0.68999900  | C   | 1.37196100  | 0.29940100  | -2.10859500 | C | -3.65239900 | 0.66467900  | -2.12929300 |
| C  | -3.27068300 | -0.32783100 | 0.29789900  | H   | 0.79148800  | 1.02923100  | -2.69471300 | C | -0.49440400 | 0.85893900  | 2.95879600  |
| C  | -3.29500600 | -0.00875800 | -1.10178200 | H   | 1.62995800  | -0.55462300 | -2.76391600 | C | -1.40280700 | -0.24754200 | -2.27566800 |
| C  | -2.60445600 | -0.78393100 | -2.04586000 | N   | 2.44250400  | 0.89727100  | -1.45517000 | H | -2.28070300 | -0.01081000 | 3.88177600  |
| C  | -1.83759100 | -1.92306000 | -1.62183000 | C   | 3.39699500  | 0.11343600  | -0.86643300 | H | 0.05366900  | 0.01570900  | 3.40240700  |
| H  | -1.33287900 | -3.19868600 | 0.07144700  | C   | 3.30102800  | -1.29350100 | -0.73316400 | N | -2.67049700 | 1.24789500  | 2.21844500  |
| H  | -2.52875600 | -1.78483100 | 1.75057100  | C   | 4.53917600  | 0.74172300  | -0.31021300 | H | 0.07409400  | 1.78284500  | 3.17434500  |
| H  | -3.76023200 | 0.93065700  | -1.41659500 | C   | 4.29870600  | -2.01887000 | -0.08946300 | H | -2.09751800 | 1.73051100  | 4.21338100  |
| H  | -2.54945300 | -0.45549200 | -3.08681600 | H   | 2.41397300  | -1.81470300 | -1.10301700 | C | -2.62390700 | 0.06772900  | -2.86880700 |
| C  | -1.00627200 | -2.67978500 | -2.60562100 | C   | 5.53081600  | 0.00493900  | 0.32066300  | H | -2.78485800 | -0.15927200 | -3.92687600 |
| H  | -0.59152600 | -2.01727200 | -3.37698800 | H   | 4.62139800  | 1.82892500  | -0.39686400 | H | -4.60467100 | 0.90722300  | -2.60592200 |
| H  | -0.17184300 | -3.19786500 | -2.11598200 | C   | 5.42485500  | -1.38498000 | 0.43718500  | H | -0.63603500 | -0.74749100 | -2.87661900 |
| H  | -1.61136300 | -3.44105900 | -3.12194500 | H   | 4.18951400  | -3.10286100 | 0.00979900  | C | 1.93713600  | -1.10829800 | -1.40463900 |
| C  | -3.94718800 | 0.58725600  | 1.29133300  | H   | 6.40298800  | 0.52147400  | 0.73122100  | C | 1.72378900  | 0.29811500  | -1.51827000 |
| H  | -3.89976800 | 1.59897800  | 0.84890000  | H   | 6.20504800  | -1.96271400 | 0.93730900  | C | 1.94892800  | 1.17841400  | -0.41235400 |
| C  | -5.41724400 | 0.20222300  | 1.43494700  | H   | 0.57469100  | -0.18500100 | -1.38706500 | C | 2.41556200  | 0.58513500  | 0.80729400  |
| H  | -5.52084500 | -0.80694300 | 1.86245700  |     |             |             |             | C | 2.68206700  | -0.79803200 | 0.91992600  |
| H  | -5.94529900 | 0.89835000  | 2.10180500  |     |             |             |             | C | 2.37173500  | -1.66628600 | -0.16870500 |
| H  | -5.94043600 | 0.20430700  | 0.46804600  | TS2 |             |             |             | H | 1.63732300  | -1.77649400 | -2.21385800 |
| C  | -3.24326700 | 0.64346700  | 2.63739200  |     |             |             |             | H | 1.29239600  | 0.69548300  | -2.44109000 |
| H  | -2.17464800 | 0.87643900  | 2.52376100  | N   | -0.62154700 | 0.67185700  | 1.52595600  | H | 2.51007700  | 1.22277500  | 1.69278000  |
| H  | -3.69464900 | 1.41516900  | 3.27566200  | C   | -1.86258900 | 0.86712600  | 1.18275000  | H | 2.95944200  | -1.22248600 | 1.88703500  |
| H  | -3.32643700 | -0.30650400 | 3.18700300  | C   | -2.21290800 | 0.63247200  | -0.19849000 | C | 2.40518400  | -3.14723700 | -0.00622600 |
| C  | 0.22009200  | -0.30632500 | 1.12212300  | C   | -3.44931700 | 0.94119800  | -0.78364500 | H | 1.40450600  | -3.55218300 | -0.23779000 |
| Ru | -1.22994000 | -0.28274700 | -0.33737400 | H   | -4.24202200 | 1.41125600  | -0.19207200 | H | 3.12172300  | -3.60022000 | -0.70641400 |
| H  | 2.05221400  | 2.13422700  | -0.85506000 | C   | -1.94582400 | 0.95027400  | 3.45398600  | H | 2.69381900  | -3.44098800 | 1.01147000  |

|                            |             |             |             |   |             |             |             |                            |             |             |             |
|----------------------------|-------------|-------------|-------------|---|-------------|-------------|-------------|----------------------------|-------------|-------------|-------------|
| C                          | 1.71902200  | 2.66976300  | -0.47681600 | C | -1.89862100 | -0.98615900 | 0.69389400  | H                          | 3.27370500  | -0.98433100 | 1.40471900  |
| H                          | 1.36962300  | 2.96676000  | 0.52951900  | C | -2.14772600 | -0.22351400 | -0.51744600 | C                          | 3.83343800  | -0.99470300 | -1.29054400 |
| C                          | 3.04480900  | 3.37928000  | -0.74241800 | C | -3.43495000 | 0.04382700  | -0.99881000 | H                          | 3.47074400  | -1.13618000 | -2.31701100 |
| H                          | 3.44812400  | 3.10124100  | -1.72816600 | H | -4.29775100 | -0.34172600 | -0.44906800 | H                          | 4.86732400  | -0.62249000 | -1.35701000 |
| H                          | 2.91979300  | 4.47145800  | -0.73320500 | C | -1.93863200 | -2.03681600 | 2.62853500  | H                          | 3.86608200  | -1.97681200 | -0.80198200 |
| H                          | 3.80688300  | 3.12302900  | 0.00740800  | C | -3.58846000 | 0.78831100  | -2.16246700 | C                          | 0.21856800  | 2.64742600  | 1.63776200  |
| C                          | 0.65477700  | 3.08688600  | -1.47707500 | C | -0.46097200 | -1.86833200 | 2.24202700  | H                          | 0.86273000  | 3.34181100  | 2.21412900  |
| H                          | -0.29155400 | 2.55112100  | -1.31485600 | C | -1.17571900 | 1.00695800  | -2.33752900 | C                          | -0.65802900 | 3.48940500  | 0.72242300  |
| H                          | 0.45347400  | 4.16428000  | -1.39896500 | H | -2.25999600 | -3.09313000 | 2.60408500  | H                          | -1.28087200 | 2.85685300  | 0.06957100  |
| H                          | 0.97155900  | 2.89990400  | -2.51458000 | H | 0.13531700  | -2.78803800 | 2.31463100  | H                          | -1.33665200 | 4.11655600  | 1.31596800  |
| C                          | -1.15470200 | 0.03366200  | -0.92569400 | N | -2.69731600 | -1.28480900 | 1.64452400  | H                          | -0.07577100 | 4.16686900  | 0.08283100  |
| Ru                         | 0.59974800  | -0.36724100 | 0.11900500  | H | 0.02929900  | -1.09978100 | 2.86045300  | C                          | -0.64455200 | 1.89000400  | 2.63880600  |
| O                          | -0.55610600 | -2.72127900 | -0.43573800 | H | -2.15985900 | -1.67707000 | 3.64540200  | H                          | -0.05850300 | 1.33052400  | 3.38089400  |
| H                          | -0.50003100 | -2.46108600 | 0.85920300  | C | -2.45591700 | 1.25786700  | -2.83529900 | H                          | -1.27854600 | 2.58743400  | 3.20293000  |
| O                          | -0.26233600 | -1.98751900 | 1.83553000  | H | -2.57400900 | 1.83108700  | -3.75954100 | H                          | -1.31568100 | 1.18138300  | 2.12879600  |
| H                          | -3.65707700 | 1.02678900  | 2.16290800  | H | -4.58622400 | 0.99941100  | -2.55403400 | C                          | -0.98939200 | 0.26624100  | -1.16181200 |
| C                          | -1.81283800 | -3.03922100 | -0.87857000 | H | -0.31136800 | 1.39748900  | -2.88640800 | Ru                         | 0.80783900  | -0.11483600 | -0.19050100 |
| H                          | -2.12316500 | -4.07043000 | -0.59075300 | C | 2.32569800  | 1.04512700  | -1.21671600 | C                          | 0.53022500  | -2.76257600 | -1.61283800 |
| H                          | -2.61600000 | -2.36646500 | -0.49344800 | C | 1.44108200  | 1.90160900  | -0.51696900 | H                          | 0.76571500  | -1.59127100 | -1.32559600 |
| H                          | -1.90382600 | -2.99789600 | -1.98640600 | C | 1.17263500  | 1.74359900  | 0.88022400  | H                          | 0.07207100  | -2.56932700 | -2.61550300 |
| H                          | 0.47601500  | -2.51616800 | 2.15693100  | C | 1.86968500  | 0.67558800  | 1.53346300  | H                          | 1.58685600  | -3.10821100 | -1.75070800 |
|                            |             |             |             | C | 2.79901800  | -0.16012000 | 0.86824300  | O                          | -0.19224800 | -3.35736100 | -0.71868500 |
|                            |             |             |             | C | 2.97875500  | -0.03170100 | -0.53579100 | H                          | -0.43618500 | -2.35400600 | 0.18913800  |
| $\alpha$ -TS2 <sub>b</sub> |             |             |             | H | 2.44596300  | 1.15439800  | -2.29684900 |                            |             |             |             |
|                            |             |             |             | H | 0.87378100  | 2.63814500  | -1.09010400 |                            |             |             |             |
| N                          | -0.53022800 | -1.42478300 | 0.83873600  | H | 1.65088700  | 0.46699400  | 2.58403000  | $\alpha$ -TS4 <sub>b</sub> |             |             |             |

|    |             |             |             |   |             |             |             |     |             |             |             |
|----|-------------|-------------|-------------|---|-------------|-------------|-------------|-----|-------------|-------------|-------------|
|    |             |             |             | C | 1.97474000  | 1.26560300  | 1.84734600  | C   | -3.56709000 | 1.75941200  | -0.79163400 |
| N  | 1.75938200  | -1.19876500 | -1.53709800 | C | 2.15929500  | 1.69484100  | 0.53534200  | C   | -4.32370500 | -0.47370300 | -0.27540700 |
| C  | 2.31450300  | -1.49161100 | -0.22451000 | C | 1.00523300  | 1.82815700  | -0.26837900 | C   | -4.59393000 | 2.28681100  | -0.02008100 |
| C  | 1.30268500  | -1.87978900 | 0.73092000  | C | -0.27458800 | 1.63712100  | 0.26851500  | H   | -2.89515300 | 2.41918200  | -1.34585800 |
| C  | 1.60777200  | -2.48937900 | 1.95720800  | C | -0.44878700 | 1.25347800  | 1.61873000  | C   | -5.35141200 | 0.06458300  | 0.49561500  |
| H  | 2.65731000  | -2.65627900 | 2.21646500  | H | 0.59953200  | 0.70302000  | 3.41090700  | H   | -4.25612600 | -1.55778400 | -0.38913200 |
| C  | 4.10492500  | -0.98711100 | -1.42005000 | H | 2.84149400  | 1.11290000  | 2.49488000  | C   | -5.48960700 | 1.44406600  | 0.64270700  |
| C  | 0.58182200  | -2.86941600 | 2.81052500  | H | 1.10283600  | 2.21091700  | -1.29152800 | H   | -4.70715500 | 3.37162300  | 0.05385100  |
| C  | 2.88762100  | -0.60639300 | -2.27706800 | H | -1.15171600 | 1.91202000  | -0.31838600 | H   | -6.06197400 | -0.60939200 | 0.98171900  |
| C  | -1.05574200 | -2.03452600 | 1.21507200  | C | -1.81448500 | 1.09415600  | 2.19743600  | H   | -6.30059300 | 1.85873400  | 1.24498700  |
| H  | 4.66523000  | -1.84320600 | -1.83917900 | H | -2.36119900 | 2.04997200  | 2.21253700  |     |             |             |             |
| H  | 2.91944400  | -0.97912500 | -3.30859700 | H | -2.43117100 | 0.40370800  | 1.60200700  |     |             |             |             |
| N  | 3.58030100  | -1.34679700 | -0.11346100 | H | -1.77585800 | 0.70967800  | 3.22490100  | N-1 |             |             |             |
| H  | 2.74229800  | 0.48320600  | -2.33022200 | C | 3.50922500  | 2.14115700  | 0.01160900  |     |             |             |             |
| H  | 4.83587600  | -0.16733700 | -1.33679300 | H | 3.61662500  | 1.73822400  | -1.01230500 | C   | 1.27504100  | -1.07207100 | -0.87861100 |
| C  | -0.74924400 | -2.64591100 | 2.42797400  | C | 3.53978800  | 3.66490400  | -0.11222600 | O   | 2.55157200  | -1.12268600 | -0.62150300 |
| H  | -1.56112600 | -2.94786400 | 3.09676600  | H | 3.42370100  | 4.13813000  | 0.87484700  | H   | 0.79271400  | -2.04911000 | -1.16112900 |
| H  | 0.80528500  | -3.34546800 | 3.76789500  | H | 4.49402000  | 4.01096500  | -0.53616100 | H   | 1.41928000  | 0.78932900  | 0.78716600  |
| H  | -2.10630000 | -1.84309300 | 0.96437500  | H | 2.73179100  | 4.04551500  | -0.75287600 | H   | 0.93831800  | -0.34170700 | -1.66761400 |
| C  | -0.03977800 | -1.60288600 | 0.34192000  | C | 4.68789000  | 1.64648600  | 0.83420600  | H   | 1.62739500  | 2.25251400  | 1.30745600  |
| Ru | -0.37782200 | -0.48435700 | -1.26408800 | H | 4.65532400  | 0.55715500  | 0.98311700  | Na  | 3.77301500  | 0.37050700  | 0.07954500  |
| C  | -2.13127400 | -1.45621900 | -1.94007700 | H | 5.63730500  | 1.89887600  | 0.33978200  | O   | 2.10270000  | 1.52316600  | 0.90245500  |
| H  | -2.50440500 | -2.20614400 | -1.21709600 | H | 4.71412900  | 2.12433500  | 1.82575500  | N   | 0.45123500  | -0.59538400 | 0.36957800  |
| H  | -2.36798200 | -1.77797800 | -2.97204700 | H | 1.49451900  | -2.08884700 | -1.95840000 | C   | -0.89914600 | -0.27976400 | 0.17974400  |
| H  | -0.83042300 | -1.78917100 | -2.15642300 | N | -2.32407500 | -0.09880500 | -1.68014600 | C   | -1.93025900 | -0.96030600 | 0.84887800  |
| C  | 0.69771600  | 1.03854400  | 2.37417700  | C | -3.38534900 | 0.36526000  | -0.91236900 | C   | -1.25296900 | 0.77296400  | -0.68583000 |

|   |             |             |             |   |             |             |             |    |             |             |             |
|---|-------------|-------------|-------------|---|-------------|-------------|-------------|----|-------------|-------------|-------------|
| C | -3.26286400 | -0.59820300 | 0.66718800  | C | -2.78703000 | -1.37044900 | -0.07827900 | H  | 1.16320400  | 2.22245900  | -0.44971900 |
| H | -1.67296300 | -1.78619500 | 1.51928700  | H | -0.76598300 | -2.11460900 | -0.21208300 | C  | 3.47550300  | -0.22190000 | 0.09609500  |
| C | -2.58669900 | 1.11769800  | -0.87601700 | C | -3.02632400 | 1.01015000  | 0.12155500  | H  | 3.00389900  | -2.29311000 | 0.50972500  |
| H | -0.45951200 | 1.32894500  | -1.19252800 | H | -1.21307200 | 2.16487700  | 0.13060400  | H  | 3.58629400  | 1.88577300  | -0.34773700 |
| C | -3.60311800 | 0.43784500  | -0.20131700 | C | -3.61335700 | -0.25047600 | 0.04389600  | H  | 4.55743500  | -0.36513400 | 0.12888100  |
| H | -4.04511400 | -1.14176700 | 1.20375100  | H | -3.22652300 | -2.36885100 | -0.15134300 | Na | -2.63441300 | -0.71501800 | 0.82028500  |
| H | -2.83666200 | 1.93901700  | -1.55304900 | H | -3.65539400 | 1.90041600  | 0.20433900  | H  | -1.57007700 | -2.62968200 | -1.39669300 |
| H | -4.64893000 | 0.71549900  | -0.34966700 | H | -4.69918200 | -0.36112000 | 0.07005300  |    |             |             |             |
| H | 0.54958100  | -1.32722700 | 1.07245100  |   |             |             |             |    |             |             |             |

N-4

|     |             |             |             |     |             |             |             |   |             |             |             |
|-----|-------------|-------------|-------------|-----|-------------|-------------|-------------|---|-------------|-------------|-------------|
|     |             |             |             | N-3 |             |             |             |   |             |             |             |
| N-2 |             |             |             |     |             |             |             | C | -1.40979700 | -1.36508200 | 0.59476200  |
|     |             |             |             | C   | -1.26639900 | 1.53783300  | -0.21094500 | O | -2.65900800 | -1.65964400 | 0.09466700  |
| C   | 1.24158700  | 1.41059000  | -0.27853900 | O   | -2.67099500 | 1.41839200  | 0.13556800  | H | -1.43917700 | -0.62521800 | 1.41896300  |
| H   | 0.97409200  | 1.78835400  | -1.29166500 | H   | -1.20814000 | 1.92196600  | -1.26008000 | H | -0.98417900 | -2.29743300 | 1.01251700  |
| H   | 0.88661500  | 2.16428400  | 0.44562700  | H   | -0.81113700 | 2.32661600  | 0.43513300  | H | -1.86575700 | 0.69024800  | -0.81768500 |
| H   | 2.86322700  | 0.43514700  | -0.69347700 | H   | -1.38634400 | -1.15581400 | -0.89387400 | H | -0.65369200 | -1.36609200 | -1.31011300 |
| O   | 2.82479200  | -1.13772000 | -0.84328600 | O   | -2.03666000 | -1.92019800 | -0.94815900 | O | -2.75522000 | 1.03107600  | -0.60632300 |
| H   | 1.08090600  | -0.59281700 | -0.57501400 | H   | -3.12904100 | 2.21549900  | -0.14902100 | H | -3.07570800 | -0.80264600 | -0.11664900 |
| H   | 3.17114200  | -1.57014700 | -1.62521200 | N   | -0.71880100 | 0.26017400  | -0.01181600 | N | -0.56264700 | -0.81338700 | -0.46050400 |
| Na  | 2.65453500  | -0.72200800 | 1.18703700  | C   | 0.64017000  | 0.15505600  | 0.01367900  | C | 0.74911900  | -0.40840900 | -0.20381000 |
| O   | 2.61198500  | 1.25784100  | -0.12844900 | C   | 1.22781600  | -1.11660500 | 0.26793300  | C | 1.63914900  | -0.23295700 | -1.27930600 |
| N   | 0.58555300  | 0.13361200  | -0.01409200 | C   | 1.54673800  | 1.22582600  | -0.21616200 | C | 1.20574300  | -0.12258400 | 1.09425900  |
| C   | -0.80248000 | 0.03786700  | -0.02495300 | C   | 2.60134200  | -1.29569200 | 0.30750100  | C | 2.93351500  | 0.22280000  | -1.06429900 |
| C   | -1.40585900 | -1.23286500 | -0.11328400 | H   | 0.55853200  | -1.96818800 | 0.43519600  | H | 1.29683200  | -0.45600900 | -2.29393900 |
| C   | -1.64133500 | 1.16190000  | 0.08181800  | C   | 2.92595700  | 1.03182200  | -0.16668700 | C | 2.50551300  | 0.34024500  | 1.29558200  |



|   |             |             |             |   |             |             |             |   |             |             |             |
|---|-------------|-------------|-------------|---|-------------|-------------|-------------|---|-------------|-------------|-------------|
| H | 0.55084700  | -0.26446900 | 1.95536800  | C | 3.23545200  | 0.75620700  | 0.27511100  | C | -2.84266800 | 1.35825700  | 0.08863800  |
| C | 3.37915200  | 0.51794000  | 0.22582200  | H | 1.73449100  | 2.01240400  | 1.19549500  | H | -0.83770900 | 2.13786200  | 0.24468500  |
| H | 3.60391500  | 0.34855700  | -1.91799900 | C | 2.44260000  | -1.30491000 | -0.69168100 | C | -3.03553400 | -1.02445100 | -0.13101000 |
| H | 2.83825400  | 0.55569900  | 2.31394300  | H | 0.29962800  | -1.66819100 | -0.49107200 | H | -1.20028300 | -2.14546700 | -0.13179300 |
| H | 4.39667700  | 0.87569600  | 0.39317700  | C | 3.49525400  | -0.43271600 | -0.40586300 | C | -3.64682600 | 0.22451000  | -0.04942300 |
| C | -2.61054700 | 2.15369100  | 0.22116500  | H | 4.05228600  | 1.44554900  | 0.50344900  | H | -3.30057500 | 2.34812000  | 0.16433100  |
| H | -2.15292900 | 3.01029100  | -0.30364600 | H | 2.63843300  | -2.24167100 | -1.21987100 | H | -3.64713400 | -1.92572500 | -0.22498100 |
| H | -3.60853500 | 2.46710900  | 0.55361900  | H | 4.51443000  | -0.68031300 | -0.71071500 | H | -4.73425600 | 0.31512400  | -0.08424300 |
| H | -2.00527700 | 1.95265900  | 1.12417900  | H | -0.53396900 | 1.16763800  | 1.46693800  |   |             |             |             |

N-TS3

N-TS2

N-TS1

|    |             |             |             |    |             |             |             |   |             |             |             |
|----|-------------|-------------|-------------|----|-------------|-------------|-------------|---|-------------|-------------|-------------|
|    |             |             |             |    |             |             |             | C | 1.27714100  | -1.43987800 | -0.13177900 |
|    |             |             |             | C  | 1.26129500  | -1.35428600 | 0.31823900  | O | 2.68680900  | -1.27252400 | -0.06845400 |
| C  | -1.35133200 | 1.33502900  | -0.75971600 | H  | 1.00536700  | -1.69987900 | 1.34867500  | H | 0.99790700  | -1.94885600 | -1.08329400 |
| O  | -2.58631300 | 1.34735500  | -0.56437600 | H  | 0.86033000  | -2.11927100 | -0.37473200 | H | 1.00970300  | -2.14137800 | 0.68290800  |
| H  | -0.76133300 | 2.28292400  | -0.70161600 | H  | 2.90005600  | -0.21654000 | 0.67587800  | H | 1.37772100  | 0.66642700  | -0.66745600 |
| H  | -1.08808600 | -0.40711600 | 0.82516600  | O  | 2.98972600  | 1.07588100  | 0.81560000  | O | 2.42019200  | 1.25003300  | -0.99506900 |
| H  | -0.89331200 | 0.62990600  | -1.49977400 | H  | 1.00259200  | 0.64886400  | 0.61345500  | H | 2.90125500  | -0.65318600 | -0.79736600 |
| H  | -1.66504300 | -2.30380800 | 1.19581100  | H  | 3.48198500  | 1.35819300  | 1.58837000  | N | 0.66430900  | -0.15260900 | 0.01690000  |
| Na | -3.56752100 | -0.53859800 | -0.13557200 | Na | 2.63691800  | 0.64206500  | -1.23615700 | C | -0.70838100 | -0.07009900 | 0.00501900  |
| O  | -1.98965800 | -1.55320400 | 0.69554000  | O  | 2.60508900  | -1.18567900 | 0.12784600  | C | -1.32430800 | 1.20584300  | 0.01946500  |
| N  | -0.44958900 | 0.50527300  | 0.69902000  | N  | 0.56075900  | -0.08316900 | 0.04030800  | C | -1.56276500 | -1.19671700 | -0.01024000 |
| C  | 0.88117900  | 0.19867000  | 0.38531500  | C  | -0.83171200 | -0.01370500 | 0.04306000  | C | -2.70431300 | 1.34148300  | 0.03334800  |
| C  | 1.93713500  | 1.07709200  | 0.66478800  | C  | -1.45950400 | 1.24422800  | 0.13549300  | H | -0.68296500 | 2.09324100  | 0.01538800  |
| C  | 1.14306400  | -0.99651500 | -0.30378100 | C  | -1.64843400 | -1.15179000 | -0.08027100 | C | -2.94826600 | -1.04602800 | 0.00882500  |

|    |             |             |             |   |            |             |             |   |             |             |             |
|----|-------------|-------------|-------------|---|------------|-------------|-------------|---|-------------|-------------|-------------|
| H  | -1.13733000 | -2.20301000 | -0.03709600 | C | 2.37133800 | 1.17234100  | -0.70372500 | C | 3.35240200  | 0.62722000  | 0.19363000  |
| C  | -3.53649800 | 0.21660200  | 0.03297300  | H | 0.38320100 | 1.83907400  | -0.18960500 | H | 4.00890700  | -1.27128300 | -0.60212200 |
| H  | -3.14272700 | 2.34377000  | 0.04425000  | C | 3.30873800 | 0.14234200  | -0.64555700 | H | 2.40285200  | 2.42069700  | 0.93520400  |
| H  | -3.57957100 | -1.93935300 | 0.00013900  | H | 3.69643800 | -1.85817800 | 0.07592000  | H | 4.36567200  | 0.99908600  | 0.35862200  |
| H  | -4.62273300 | 0.32681900  | 0.04575400  | H | 2.61308700 | 2.09904200  | -1.23262200 | C | -2.81804800 | 1.76531500  | -0.18819200 |
| Na | 2.55420600  | 0.80696800  | 1.11301100  | H | 4.28715600 | 0.25493700  | -1.11781200 | H | -2.29448000 | 2.58202100  | -0.72062400 |
| H  | 2.32065100  | 1.75983000  | -1.80212500 |   |            |             |             | H | -3.88440300 | 2.05585200  | -0.14563900 |
|    |             |             |             |   |            |             |             | H | -2.45340700 | 1.78601900  | 0.86405100  |

N-TS5

N-TS4

|    |             |             |             |   |             |             |             |       |             |             |             |
|----|-------------|-------------|-------------|---|-------------|-------------|-------------|-------|-------------|-------------|-------------|
|    |             |             |             | C | -1.36720700 | -1.22929700 | 0.90552500  | N-TS6 |             |             |             |
| C  | -1.23744000 | 0.65534000  | 1.44590300  | O | -2.62941400 | -1.38471200 | 0.59151100  |       |             |             |             |
| H  | -0.79515100 | 1.64374700  | 1.67357200  | H | -1.09457100 | -0.38763400 | 1.58964100  | C     | -1.12339500 | 1.61114200  | -0.37017600 |
| H  | -3.44533300 | 0.11920000  | -0.38520600 | H | -0.85078300 | -2.14355400 | 1.26287100  | O     | -2.06086100 | 1.23102300  | 1.26971400  |
| H  | -2.15743500 | 0.44861900  | 2.00486700  | H | -1.34207900 | -0.01214300 | -0.77985100 | H     | -2.07040800 | 1.89788100  | -0.83340100 |
| H  | -4.28819200 | -1.15625300 | -0.07682300 | H | -0.60943100 | -1.57900400 | -1.06558400 | H     | -0.50787100 | 2.44650800  | -0.01459000 |
| Na | -1.43778600 | -0.71925400 | -0.95570400 | O | -2.63840000 | 0.54470600  | -0.81917400 | H     | -1.41992600 | -0.38545400 | -0.53721300 |
| O  | -3.68652300 | -0.78409200 | -0.72634200 | H | -2.87314100 | -0.42665800 | -0.05406300 | C     | 0.74479600  | 0.14750000  | -0.39103300 |
| H  | -2.18836700 | 2.16839300  | -0.10845900 | N | -0.56874900 | -0.78978900 | -0.41923600 | C     | 1.03690900  | -1.17615600 | -0.02701700 |
| O  | -2.14044900 | 1.20701900  | -0.11593400 | C | 0.76441700  | -0.31783700 | -0.23879200 | C     | 1.78381000  | 1.09077500  | -0.41526200 |
| N  | -0.47404100 | -0.38434900 | 1.16355200  | C | 1.86172500  | -1.12122200 | -0.55528900 | C     | 2.33489700  | -1.53865000 | 0.31976400  |
| C  | 0.76805700  | -0.14921800 | 0.58787500  | C | 0.95919500  | 0.95688200  | 0.30203500  | H     | 0.22360400  | -1.90546100 | -0.00225300 |
| C  | 1.72752800  | -1.18796000 | 0.61905700  | C | 3.15322700  | -0.64328100 | -0.34510400 | C     | 3.07847800  | 0.71897100  | -0.06405800 |
| C  | 1.11901500  | 1.03506900  | -0.10559600 | H | 1.70199000  | -2.11964600 | -0.97200000 | H     | 1.58011600  | 2.11548500  | -0.73705700 |
| C  | 2.97266700  | -1.04009600 | 0.02063700  | C | 2.25316600  | 1.42292600  | 0.51721600  | C     | 3.36267400  | -0.59538800 | 0.30655800  |
| H  | 1.46488500  | -2.10665800 | 1.15069300  | H | 0.09336700  | 1.58057200  | 0.53927000  | H     | 2.54447100  | -2.57200100 | 0.60672800  |

|       |             |             |             |   |             |             |             |         |             |             |             |
|-------|-------------|-------------|-------------|---|-------------|-------------|-------------|---------|-------------|-------------|-------------|
| H     | 3.87772900  | 1.46366600  | -0.09436000 | H | -4.64203600 | 1.53517900  | -2.18879200 | C       | -1.14500000 | 0.20894500  | -0.96483000 |
| H     | 4.38083200  | -0.88399600 | 0.57586300  | H | -0.52726500 | 0.56253200  | -3.00513300 | Ru      | 0.60166400  | -0.49357000 | -0.11453900 |
| N     | -0.57191900 | 0.47451500  | -0.75654500 | C | 2.15651600  | -0.23361300 | -1.58582200 | C       | -2.86358600 | -0.36905500 | 2.26057500  |
| C     | -3.55259700 | -1.17336100 | -0.42863300 | C | 1.70490100  | 1.03397600  | -1.10249700 | N       | -2.04608100 | -0.18475300 | 1.19584800  |
| H     | -3.44998800 | -1.96794600 | -1.18730300 | C | 1.71846900  | 1.36155700  | 0.28242600  | H       | -3.91308700 | -0.09375100 | 2.21897500  |
| H     | -4.31027800 | -1.51853400 | 0.29547600  | C | 2.13597500  | 0.32023700  | 1.16216900  | O       | 0.02038200  | -2.39048000 | -0.63342000 |
| H     | -3.97957000 | -0.28762300 | -0.94204700 | C | 2.67186900  | -0.92129600 | 0.70369000  | C       | -1.27870500 | -2.83239100 | -0.63871800 |
| O     | -2.33657400 | -0.91645600 | 0.20116900  | C | 2.65887900  | -1.21846700 | -0.67855700 | H       | -1.29895800 | -3.90901300 | -0.90048800 |
| H     | -2.31676100 | 0.14804300  | 0.89211200  | H | 2.08010300  | -0.46930000 | -2.64933700 | H       | -1.80136100 | -2.75681000 | 0.34376400  |
| H     | -1.36246100 | 1.10229900  | 1.92593000  | H | 1.26878300  | 1.73901200  | -1.81561100 | H       | -1.93481200 | -2.32499800 | -1.38092800 |
|       |             |             |             | H | 2.03138500  | 0.48406100  | 2.24075800  |         |             |             |             |
|       |             |             |             | H | 2.97391000  | -1.68661400 | 1.42099700  |         |             |             |             |
| Ru7-5 |             |             |             | C | 2.95548800  | -2.59252700 | -1.16740700 | Ru7-TS3 |             |             |             |
|       |             |             |             | H | 3.59613200  | -3.14588900 | -0.47014200 |         |             |             |             |
| N     | -0.79572100 | -0.60961700 | 1.47456000  | H | 1.99303300  | -3.12835500 | -1.25083700 | N       | 0.90537900  | -1.26126800 | -1.12531700 |
| C     | -2.26806500 | 0.28067900  | -0.11970300 | H | 3.43101900  | -2.58142800 | -2.15642300 | C       | 0.58894200  | -1.37979100 | 1.18436100  |
| C     | -3.51594800 | 0.75170000  | -0.52711100 | C | 1.25025400  | 2.68491600  | 0.84196200  | C       | 0.97823500  | -1.61524900 | 2.50141100  |
| H     | -4.35828100 | 0.79334900  | 0.16821400  | H | 0.70938300  | 2.44635800  | 1.77763100  | H       | 1.99458900  | -1.94552800 | 2.73477700  |
| C     | -2.10366800 | -0.93534000 | 3.26990400  | C | 2.45188100  | 3.55280800  | 1.20826200  | C       | 2.99376900  | -2.05606900 | -1.40676700 |
| C     | -3.67344100 | 1.16402100  | -1.84792800 | H | 3.03983500  | 3.80793600  | 0.31327400  | C       | 0.04544900  | -1.42294100 | 3.51933400  |
| C     | -0.81692600 | -1.06821400 | 2.72689400  | H | 2.13449100  | 4.49641800  | 1.67494000  | C       | 1.83993500  | -1.55975700 | -2.03415600 |
| C     | -1.35320900 | 0.62039000  | -2.28829600 | H | 3.12822600  | 3.04351800  | 1.90935500  | C       | -1.62087900 | -0.76794000 | 1.87880800  |
| H     | 0.08945700  | -1.47853500 | 3.16578900  | C | 0.28925500  | 3.42980400  | -0.06925200 | H       | 1.63493600  | -1.40336500 | -3.09078600 |
| H     | -2.43903600 | -1.21463600 | 4.26395800  | H | -0.56481000 | 2.80388600  | -0.36601400 | H       | 3.91565600  | -2.38427400 | -1.87748700 |
| C     | -2.59192800 | 1.09102200  | -2.72834200 | H | -0.10535600 | 4.32395100  | 0.43285700  | C       | -1.25078000 | -1.00584500 | 3.20265500  |
| H     | -2.71802500 | 1.40219500  | -3.76871000 | H | 0.78555600  | 3.77752000  | -0.98841100 | H       | -1.98206700 | -0.85811600 | 4.00206500  |

|    |             |             |             |       |             |             |             |   |             |             |             |
|----|-------------|-------------|-------------|-------|-------------|-------------|-------------|---|-------------|-------------|-------------|
| H  | 0.33062100  | -1.60280800 | 4.55776500  | C     | 3.25733200  | 2.74139000  | -0.96799600 | H | -4.65832800 | 2.32687700  | -1.41908700 |
| H  | -2.63354100 | -0.41867500 | 1.65062600  | H     | 3.19067500  | 3.65017100  | -0.35022800 | H | -0.44413100 | 2.07894100  | -2.26650900 |
| C  | -0.70673900 | -0.94160300 | 0.82662900  | H     | 4.32021600  | 2.56892600  | -1.19334100 | C | 2.14872700  | 0.50586000  | -1.48151100 |
| Ru | -1.06531700 | -0.56050600 | -1.06450300 | H     | 2.74594600  | 2.95472900  | -1.91742700 | C | 1.74318900  | 1.29574500  | -0.36614900 |
| H  | 3.28820400  | -2.35028600 | 0.811178100 | C     | 3.41056600  | 1.23061900  | 1.03004300  | C | 1.79267600  | 0.80779800  | 0.97264300  |
| C  | -2.96194800 | -1.58152900 | -1.07737500 | H     | 2.93714800  | 0.42137800  | 1.60664500  | C | 2.12978800  | -0.56172900 | 1.11873800  |
| H  | -3.16159800 | -2.03421900 | -0.08254100 | H     | 4.44125400  | 0.92478600  | 0.79931100  | C | 2.55129200  | -1.38096400 | 0.03186300  |
| H  | -3.34952600 | -2.22424500 | -1.89756400 | H     | 3.47920300  | 2.10742500  | 1.69251300  | C | 2.53927000  | -0.85688100 | -1.28817300 |
| H  | -1.63627200 | -2.08170900 | -1.34834900 | N     | 1.44570600  | -1.56089800 | 0.08356000  | H | 2.10688500  | 0.92136300  | -2.49050200 |
| O  | -3.11099200 | -0.28279500 | -1.21129700 | C     | 2.70517800  | -2.04689700 | -0.05322400 | H | 1.37692000  | 2.31096700  | -0.55314400 |
| C  | -0.74919100 | 2.39434900  | 1.34334400  |       |             |             |             | H | 2.05474700  | -1.01109900 | 2.11510100  |
| C  | 0.62378400  | 2.13251400  | 1.19665300  |       |             |             |             | H | 2.81815100  | -2.42587800 | 0.20155900  |
| C  | 1.16227300  | 1.75764300  | -0.02533900 | Ru7-6 |             |             |             | C | 2.92360800  | -1.70515100 | -2.45616300 |
| C  | 0.27188000  | 1.62641100  | -1.12249500 |       |             |             |             | H | 2.72360900  | -2.76685700 | -2.26571300 |
| C  | -1.10079400 | 1.88807600  | -0.97736200 | N     | -0.93017700 | -1.50306900 | 0.65193900  | H | 2.37259700  | -1.41405600 | -3.35891500 |
| C  | -1.63127000 | 2.28638800  | 0.27896400  | C     | -2.35533200 | 0.10511700  | -0.29450900 | H | 3.99768700  | -1.60069800 | -2.67397700 |
| H  | -1.13418300 | 2.68127500  | 2.32636800  | C     | -3.60002300 | 0.71368400  | -0.45814100 | C | 1.41272800  | 1.67290000  | 2.15273900  |
| H  | 1.27246900  | 2.22851900  | 2.07118100  | H     | -4.48778000 | 0.32317700  | 0.04626800  | H | 1.46056100  | 1.02381500  | 3.04561900  |
| H  | 0.68665400  | 1.44142900  | -2.11951600 | C     | -2.32593100 | -2.77390400 | 1.87345900  | C | 2.42491300  | 2.79868300  | 2.34356600  |
| H  | -1.74982700 | 1.93489900  | -1.85746100 | C     | -3.69398100 | 1.83467800  | -1.27798500 | H | 2.41410700  | 3.49152900  | 1.48793800  |
| C  | -3.09371700 | 2.54101500  | 0.42438500  | C     | -1.00143200 | -2.56277100 | 1.46400200  | H | 2.19957000  | 3.38961700  | 3.24302100  |
| H  | -3.44788200 | 3.30178200  | -0.28778800 | C     | -1.31803600 | 1.68383300  | -1.73729100 | H | 3.45035600  | 2.41556600  | 2.44149600  |
| H  | -3.66188700 | 1.62490100  | 0.20345700  | H     | -0.09900500 | -3.12058000 | 1.70162700  | C | -0.00829300 | 2.21295400  | 2.04976800  |
| H  | -3.35133800 | 2.87975300  | 1.43618800  | H     | -2.70260000 | -3.55216300 | 2.53006700  | H | -0.74401000 | 1.39813100  | 1.99508900  |
| C  | 2.64327200  | 1.54395200  | -0.24354800 | C     | -2.54877800 | 2.31590800  | -1.91750600 | H | -0.25671500 | 2.84205400  | 2.91700600  |
| H  | 2.74307300  | 0.67461700  | -0.91931900 | H     | -2.61950700 | 3.19260100  | -2.56716200 | H | -0.14723500 | 2.82942900  | 1.14798200  |

|    |             |             |             |
|----|-------------|-------------|-------------|
| C  | -1.16878600 | 0.55926500  | -0.90859900 |
| Ru | 0.53861900  | -0.48657400 | -0.44514500 |
| C  | -3.05945100 | -1.77553700 | 1.25596300  |
| N  | -2.19131000 | -1.02782600 | 0.52960000  |
| H  | -4.12015300 | -1.54486400 | 1.27486300  |
| H  | -0.06141600 | -1.31929100 | -1.69728700 |
